# Combining 3D single molecule localization strategies for reproducible bioimaging

Clément Cabriel<sup>1,\*</sup>, Nicolas Bourg<sup>1</sup>, Pierre Jouchet<sup>1</sup>, Guillaume Dupuis<sup>2</sup>, Christophe Leterrier<sup>3</sup>, Aurélie Baron<sup>4</sup>, Marie-Ange Badet-Denisot<sup>4</sup>, Boris Vauzeilles<sup>4,5</sup>, Emmanuel Fort<sup>6</sup>, and Sandrine Lévêque-Fort<sup>1,\*\*</sup>

<sup>1</sup>Institut des Sciences Moléculaires d'Orsay (ISMO), CNRS UMR 8214, Université Paris-Sud, bâtiment 520, rue André Rivière, 91405 Orsay Cedex, France

<sup>2</sup>Université Paris-Sud, Centre de Photonique BioMédicale (CPBM), CNRS FR 2764, Fédération LUMAT, bâtiment 520, rue André Rivière, 91405 Orsay Cedex, France

<sup>3</sup>Aix-Marseille Université, CNRS, INP UMR7051, Marseille, France

<sup>4</sup>Centre de Recherche de Gif, Institut de Chimie des Substances Naturelles du CNRS, Gif-sur-Yvette, France

<sup>5</sup>Laboratoire de Synthèse de Biomolécules, Institut de Chimie Moléculaire et des Matériaux d'Orsay, Université Paris-Sud, CNRS UMR 8182, Orsay, France

<sup>6</sup>Institut Langevin, ESPCI ParisTech, CNRS, PSL Research University, 1 rue Jussieu, F-75005 Paris, France

\*Corresponding author: [clement.cabriel@u-psud.fr](mailto:clement.cabriel@u-psud.fr)

\*\*E-mail: [sandrine.leveque-fort@u-psud.fr](mailto:sandrine.leveque-fort@u-psud.fr)

November 16, 2018

**We developed a 3D localization-based super-resolution technique providing a slowly varying localization precision over a 1  $\mu\text{m}$  range with precisions down to 15 nm. The axial localization is performed through a combination of point spread function (PSF) shaping and supercritical angle fluorescence (SAF), which yields absolute axial information. Using a dual-view scheme, the axial detection is decoupled from the lateral detection and optimized independently to provide a weakly anisotropic 3D resolution over the imaging range. This method can be readily implemented on most homemade PSF shaping setups and provides drift-free, tilt-insensitive and achromatic results. Its insensitivity to these unavoidable experimental biases is especially adapted for multicolor 3D super-resolution microscopy, as we demonstrate by imaging cell cytoskeleton, living bacteria membranes and axon periodic submembrane scaffolds. We further illustrate the interest of the technique for biological multicolor imaging over a several- $\mu\text{m}$  range by direct merging of multiple acquisitions at different depths.**

Despite recent advances in localization-based super-resolution techniques, 3D fluorescence imaging of biological samples remains a major challenge, mostly because of its lack of versatility. While photoactivated localization microscopy (PALM) and (direct) stochastic optical reconstruction microscopy ((d)STORM) can easily provide a lateral localization precision (i.e. the standard deviation of the position estimates) down to 5–10 nm [1, 2, 3, 4], a great deal of effort is being made to develop quantitative and reproducible 3D super-localization methods. The most widely used 3D SMLM technique is astigmatic imaging, which relies on the use of a cylindrical lens to apply an astigmatic aberration in the detection path to encode the axial information in the shape of the spots, achieving an axial localization precision down to 20–25 nm [5]—though the precision quickly varies with the axial position: 300 nm away from the focus, the precision is typically around 60 nm (see **Supplementary Figure 1**). Other Point Spread Function (PSF) shaping methods are also available [6, 7, 8], but their implementations are not as inexpensive and straightforward. Still, all PSF shaping methods including astigmatic

44 imaging suffer from several drawbacks such as axial drifts, chromatic aberration, field-varying geo-  
45 metrical aberrations and sample tilts. These sources of biases often degrade the resolution or hinder  
46 colocalization and experiment reproducibility. Axial measurements can also be performed thanks to  
47 intensity-based techniques like Supercritical Angle Fluorescence (SAF) [9, 10, 11, 12, 13, 14], which re-  
48 lies on the detection of the near-field emission of fluorophores coupled into propagative waves at the  
49 sample/glass coverslip interface due to the index mismatch. Combined with SMLM, this technique,  
50 called Direct Optical Nanoscopy with Axially Localized Detection (DONALD), yields absolute axial  
51 positions (i.e. independent of the focus position) in the first 500 nm beyond the coverslip with a  
52 precision down to 15 nm [15, 16]. The principle relies on the comparison between the SAF and the  
53 Undercritical Angle Fluorescence (UAF) components to extract the absolute axial position.

54 We set out to develop a microscopy technique that offers precise and unbiased results to enable  
55 reliable quantitative biological studies in the first micron beyond the coverslip. Starting from the  
56 efficient and straightforward astigmatic imaging, we propose to push back its previously mentioned  
57 limits thanks to a novel approach based on a dual-view setup (**Fig. 1a**) that combines two features.  
58 First, it decouples the lateral and axial detections to optimize the 3D localization precision, and sec-  
59 ond, it uses two different sources of axial information: a strong astigmatism-based PSF measurement  
60 is merged with a complementary SAF information that provides an absolute reference. This reference  
61 is crucial to render the axial detection insensitive to axial drifts and sample tilts as well as chromatic  
62 aberration: unlike most other techniques that use fiducial markers [17] or structure correlation [5] to  
63 provide these corrections, here we intend to use the fluorophores themselves as absolute and bias-  
64 insensitive references. Besides, by applying a large astigmatic aberration on one fluorescence path  
65 only, this technique optimizes the axial precision for the collected photon number (**Supplementary**  
66 **Fig. 1**) and maintains a slowly varying localization precision over the imaging depth. Unlike most  
67 PSF shaping implementations found in the literature, which use moderate aberrations [5, 18, 19] to  
68 preserve the lateral resolution, the dual path detection allows one to fully benefit from the astig-  
69 matism capabilities. Indeed, as the lateral detection is mostly provided by the aberration-free path,  
70 the strong PSF shaping does not compromise the lateral detection. In order to merge the axial and  
71 lateral information sources, each is assigned a relative weight according to its localization preci-  
72 sion (see **Fig. 1b** and **Methods**). Such a setup exhibits a major improvement in terms of both axial  
73 precision and precision curve flatness despite only half of the photons being used for the axial lo-  
74 calization far from the coverslip compared to a standard single-view PSF measurement microscope.  
75 As a result, this technique, called Dual-view Astigmatic Imaging with SAF Yield (DAISY), exhibits  
76 a weakly anisotropic resolution over the whole capture range. We first performed the calibration of  
77 the astigmatism-based axial detection using 15  $\mu\text{m}$  diameter latex microspheres coated with Alexa  
78 Fluor (AF) 647 as described in [20] in order to account for the influence of the optical aberrations on  
79 the PSFs and thus eliminate this axial bias source (see **Methods**). Then, to evaluate the localization  
80 precision of DAISY, we imaged dark red 40-nm diameter fluorescent beads located at various ran-  
81 domly distributed heights with a weak 637 nm excitation so that their emission level matched that of  
82 AF647 in typical dSTORM conditions, i.e. 5500 UAF photons emitted per bead per frame on average  
83 (**Fig. 1c**). As it takes advantage of the good performance of the SAF detection near the coverslip,  
84 DAISY exhibits a resolution that slowly varies with depth: the lateral and axial precisions reach val-  
85 ues as low as 8 nm and 12 nm respectively, and they both remain inferior to 20 nm in the first 600 nm.  
86 This feature is rather uncommon with astigmatic imaging implementations, which typically provide  
87 at best 20–25 nm axial precision [5] and only in a limited axial range of approximately 200–300 nm  
88 according to CRLB calculations (**Supplementary Fig. 1a**)—only the dual-objective implementation  
89 achieves better precisions, at the cost of a much increased complexity [21].

90 Our technique thus provides precise 3D super resolution images (**Fig. 1d–e**); still, at this precision  
91 level, any experimental uncertainty or bias can have devastating effects on the quality of the ob-  
92 tained data. The first source of error that has to be dealt with is the drifts that typically come from  
93 a poor mechanical stability of the stage or from thermal drifts. Lateral drifts are well known and  
94 can often be easily corrected directly from the localized data using cross-correlation algorithms [22].  
95 However, accounting for the axial drifts can be much more demanding since 3D cross-correlation  
96 algorithms require long calculation times unless they sacrifice precision. Tracking fiducial markers is

97 also possible [17], but since it requires a specific sample preparation and uses a dedicated detection  
98 channel at a different wavelength, it is not very practical. It is worth noticing that most commercially  
99 available locking systems typically stabilize the focus position at  $\pm 30$  nm at best (**Supplementary**  
100 **Fig. 2**), which is hardly sufficient for high resolution imaging. As positions are measured relative  
101 to the focus plane with PSF shape measurement methods, axial drifts induce large losses of resolution.  
102 On the contrary, SAF detection yields absolute results; thus it is not sensitive to drifts. We use  
103 this feature to provide a reliable drift correction algorithm: for each localization, the axial position  
104 detected with the SAF and the astigmatic modalities are correlated, which allows us to monitor the  
105 focus drift and to consequently correct the astigmatism results with an accuracy typically below 6 nm  
106 (see **Methods**). To highlight the importance of this correction, we plotted the  $x$ - $z$  and  $y$ - $z$  profiles of a  
107 microtubule labeled with AF647 as a function of time with both an astigmatism-based detection and  
108 DAISY (**Fig. 2a**): unlike the DAISY profiles, the astigmatism profiles exhibit a clear temporal shift,  
109 which results in a dramatic apparent broadening of the filament.

110 In the framework of quantitative biological studies, the axial detection can furthermore be hampered  
111 by the axial chromatic aberration due to dispersion by the lenses, including the objective lens. If  
112 uncorrected, such a chromatic shift induces a bias in the results of multicolor sequential acquisitions,  
113 thus hindering colocalization. However, as DAISY provides absolute axial information thanks to  
114 the SAF measurement, it is not sensitive to this chromatic aberration. We performed a two-color  
115 sequential acquisition on microtubules labeled with AF647 and AF555 (**Fig. 2b**). It illustrates the  
116 chromatic dependence inherent in standard PSF shaping detection (which exhibits chromatic shifts  
117 as large as 70 nm) and the insensitivity of DAISY to this effect (chromatic shift inferior to 5 nm).  
118 Because of the chromatic shift, the uncorrected astigmatism results appear somewhat inconsistent,  
119 whereas the colocalization is much more obvious with DAISY. Consequently, unbiased dual-color  
120 3D images of biological samples can be obtained thanks to sequential acquisitions: we illustrate this  
121 on a sample with the actin and the tubulin labeled with AF647 and a 560-nm-excitable DNA-PAINT  
122 fluorophore respectively (**Fig. 2c**).

123 It is well known that axial biases in PSF shaping measurements can further stem from tilts of the stage  
124 or sample holder, as well as from field-dependent geometrical optical aberrations. These issues were  
125 thoroughly studied by Diezmann *et al.*, who reported discrepancies higher than 100 nm over one  
126 field of view [23]. Although assessing tilts on biological samples is difficult with PSF measurement  
127 methods, DAISY makes this measurement straightforward since the absolute reference provided by  
128 the SAF detection can be used to measure the values of the astigmatic axial positions detected for  
129 molecules at the coverslip as a function of their lateral positions and then correct the tilt. We per-  
130 formed DAISY acquisitions on 20-nm diameter fluorescent beads at the coverslip and displayed the  
131  $z$  values obtained with both an astigmatism-based detection and DAISY. While the former exhibits a  
132 clear tilt ranging from -30 nm to +30 nm over a 30  $\mu$ m wide field, the latter is insensitive to the tilt,  
133 with less than 2 nm axial discrepancy between the two sides of the field (**Fig. 2d**).

134 Aside from tilt effects, field-dependent aberrations also induce PSF shape deformations, leading to  
135 axial biases. Although we do not actually perform corrections, DAISY is less sensitive to that effect  
136 compared to standard astigmatism imaging: on the one hand, the SAF detection relies on intensity  
137 measurement, and on the other hand, as DAISY uses a high astigmatism, i.e. strongly aberrated  
138 PSFs, it exhibits little sensitivity to remaining field aberrations. To illustrate this phenomenon, we  
139 compared tilt-corrected axial positions obtained with 20-nm diameter fluorescent beads deposited  
140 on a coverslip between a standard weaker astigmatic detection (350 nm between the two focal lines,  
141 close to the values commonly found in the literature) and DAISY. We got rid of the dispersion due  
142 to the localization precision by averaging the results over time for each bead and we plotted the  
143 corresponding detected depth histograms over one 30  $\mu$ m wide field of view (**Supplementary Fig. 3**).  
144 The widths of the distributions evidence a much lower impact on the DAISY detection (standard  
145 deviation equal to 21 nm) than on the standard astigmatic detection (standard deviation equal to 45  
146 nm).

147 Lastly, the optical aberrations applied in PSF shaping-based setups not only deform the PSFs, but  
148 they may also distort the field itself laterally. For instance, when astigmatism is used, the system  
149 has two different focal lengths in  $x$  and  $y$ , which implies that the magnification is different in  $x$  and

150 *y*. While this effect is of the order of a few percents, it definitely biases the results whenever it is  
151 necessary to measure lateral distances precisely. With DAISY, evaluating this image distortion is  
152 straightforward thanks to the non-astigmatic detection path: a cross-correlation performed between  
153 the astigmatic and the unaberrated 2D SMLM images directly gives the magnification difference  
154 between the *x* and *y* axes, which accounts for 3.5% approximately in our case (Fig. 2e). By applying an  
155 affine transformation, the deformation is then corrected: the final lateral discrepancy between the two  
156 images was found to be below 3 nm over the whole 25 nm-wide field in Fig. 2e. It should be noticed,  
157 however, that a solution to avoid such a deformation would be to place the cylindrical lens in the  
158 Fourier plane, although most reported PSF shaping setups do not use this optical configuration. Also,  
159 more complex PSF shapes might induce complex field distortions—potentially making the correction  
160 more difficult.

161 To evidence the performance of DAISY for unbiased, reproducible and quantitative experiments,  
162 we used it to image biological samples. We illustrate the performances in terms of resolution by  
163 performing acquisitions on living *E. coli* bacteria adhered to a coverslip. The envelope of bacteria  
164 was labeled with both AF647 and AF555 using a click chemistry process (see Methods) [24, 25].  
165 Since the lipopolysaccharide (LPS) layer is thin in Gram-negative bacteria, this is a good sample to  
166 observe the influence of the localization precision. We present in Fig. 3a–b 2D and 3D images of  
167 a region of interest and in Fig. 3c an *x*-*z* slice along the line displayed in Fig. 3a. The measured  
168 diameter of the bacterium is around 1  $\mu\text{m}$  but still it does not exhibit a strong loss of resolution at  
169 its edges. To evidence this, we also plotted the lateral and axial histograms in the boxed regions  
170 (Fig. 3c). The axial standard deviations were found to be respectively around 30 nm and 45 nm at  
171 the bottom and at the top of the cell, while lateral standard deviations were around 27 nm in both  
172 colors. Taking into account the size of the LPS layer (<10 nm), of the label—i.e. the DBCO-sulfo-biotin  
173 and streptavidin-AF construction—(10 nm) and the effect of the curvature of the bacterium over the  
174 width of the area used for the analysis (10 nm), these values are consistent with the localization  
175 precision curves plotted in Fig. 1c. As a comparison, the results obtained on the same sample with  
176 uncorrected astigmatism and with DONALD are provided in Supplementary Fig. 4. Like DAISY,  
177 DONALD features an absolute detection, insensitive to both chromatic aberration and axial drift.  
178 However, the axial precision of DONALD deteriorates sharply with the depth due to the decay of  
179 the SAF signal; thus the top half of the sample (beyond 500 nm) is hardly visible, whereas DAISY  
180 clearly permits of imaging up to 1  $\mu\text{m}$ . Uncorrected astigmatism has the same capture range as  
181 DAISY, but since it lacks the absolute information, it exhibits an axial shift between the two colors as  
182 well as a broadening of the histogram widths due to the axial drift.

183 We then used DAISY to visualize the periodic submembrane scaffold present along the axon of cul-  
184 tured neurons [26]. We imaged the 3D organization of two proteins within this scaffold: adducin (la-  
185 beled with AF647) that associates with the periodic actin rings, and  $\beta$ 2-spectrin (labeled with AF555)  
186 that connect the actin rings (Fig. 3d–f). The lateral resolution allowed us to easily resolve the alter-  
187 nating patterns of adducin rings and  $\beta$ 2-spectrin epitopes and their 190 nm periodicity (Fig. 3g) [27].  
188 Thanks to the axial resolution of DAISY, we were also able to resolve the submembrane localization  
189 of both proteins across the whole diameter of the axon at 600 nm depth (Fig. 3h).

190 Taking advantage of the features of DAISY for unbiased sequential imaging, we propose an imple-  
191 mentation allowing single-color and multicolor imaging at wider depth ranges by stacking the results  
192 of multiple acquisitions on the same field at different heights. Although PSF measurement methods  
193 also allow this type of acquisitions, DAISY is especially suited in this case thanks to its previously  
194 described intrinsic bias correction features. Since the SAF signal quickly decays with the depth in  
195 the first 500 nm above the coverslip, the absolute reference is accessible only in the first stack. Still,  
196 as it provides unbiased results, the top of this first stack serves as an absolute reference for the next  
197 stack, which is matched to the previous using an axial position cross-correlation algorithm. In other  
198 words, the first 1  $\mu\text{m}$  unbiased slice is interlaced with the following one, which contains the posi-  
199 tions between 600 nm and 1.6  $\mu\text{m}$  (as described in the schematic in Fig. 4a). The absolute reference  
200 is thus transferred from the first slice onto the second, which becomes insensitive to axial detection  
201 biases. Similarly, the third slice, containing positions from 1.2  $\mu\text{m}$  to 2.2  $\mu\text{m}$  is intertwined with the  
202 second by position cross-correlation and thus it also benefits from the absolute reference and the bias

203 insensitivity that it brings. An arbitrary number of slices can be recorded and merged together to  
204 obtain an extended depth image—the only limitations being acquisition time, photobleaching and  
205 aberrations inherent in depth imaging. We illustrate the method with a single-color acquisition se-  
206 ries (COS-7 cells,  $\alpha$ - and  $\beta$ -tubulin labeled with AF647) in **Fig. 4b–d**: the stack of the three slices  
207 (**Fig. 4e**) obviously shows information in deep regions (beyond 1  $\mu\text{m}$ ) that would not be accessible  
208 with a single acquisition. We then imaged a dual-label tubulin-clathrin sample (COS-7 cells, light  
209 chain and heavy chain clathrin labeled with AF647,  $\alpha$ - and  $\beta$ -tubulin labeled with 560-nm-excitable  
210 DNA-PAINT imager) in three sequential acquisitions while shifting the focus by 600 nm between  
211 each of them to obtain a 3D dual-color 2  $\mu\text{m}$  imaging range set of data (**Fig. 4f**). Aside from the fact  
212 that no axial mismatch between the subsequent acquisitions is observed, the localization precision  
213 remains satisfactory after 1.5  $\mu\text{m}$  as it is limited only by the effect of the spherical aberration and  
214 sample-induced aberrations. To evidence this, we measured the dispersion of the localizations on  
215 two clathrin spheres located close to the ventral membrane (200 nm depth) and the dorsal membrane  
216 (1500 nm depth) respectively (**Fig. 4g–h**). The lateral and axial full widths at half maximum were  
217 found to be 38 nm in  $xy$  and 40 nm in  $z$  at 200 nm depth, and 47 nm in  $xy$  and 64 nm in  $z$  at 1500 nm  
218 depth—as expected, the axial precision is more affected by the effect of the aberrations in the volume  
219 than the lateral precision.

220 Thanks to the decoupling of the axial and lateral detections and to the combination of two axial  
221 SMLM techniques yielding complementary information, we could achieve reliable and unbiased  
222 imaging that enables quantitative studies on biological samples. DAISY offers a slowly varying,  
223 weakly anisotropic resolution over the whole micron-wide capture range, with a localization preci-  
224 sion down to 15 nm. Thanks to both the SAF and the astigmatic detections, DAISY provides absolute  
225 axial results that prove to be insensitive to axial drifts and sample tilts as well as chromatic aber-  
226 ration. These features make it especially suited for biological samples imaging near the coverslip,  
227 which finds applications in the framework of cell adhesion or motility processes or bacteria imaging.  
228 Moreover, stacking acquisitions performed at different heights also enables reproducible and reliable  
229 studies at more important depths, up to a few  $\mu\text{m}$ . Finally, as the implementation of the dual-view  
230 detection scheme we use is straightforward, it would also benefit any PSF measurement method  
231 other than astigmatism, such as dual helix PSF [6], self-bending PSF [7], saddle-point PSF [8] and  
232 tetrapod [28], which offer better performances in terms of localization precision and capture range.

## 233 Acknowledgements

234 We thank Ultivue for consumable gifts and Abbelight for software and buffers gifts.  
235 We acknowledge the contribution of the Centre de Photonique BioMédicale to cell culture and label-  
236 ing. We also acknowledge the help of Marion Bardou with cell culture. We thank Rym Boudjemaa for  
237 her contribution to the bacteria labeling project. Finally, we thank Caroline Schou and Yann Kergutuil  
238 for their help regarding software analysis.

239 This work was supported by the AXA research fund, the ANR (LABEX WIFI, ANR-10-LABX-24),  
240 the DIM CNANO Île-de-France, the IRS Bioprobe, the Mission interdisciplinarité of the CNRS and  
241 LaserLab-Europe EUH2020654148.

## 242 Author contributions

243 C.C., N.B., P.J., G.D., E.F. and S.L.-F. conceived the project. C.C. designed the optical setup and  
244 performed the acquisitions. C.C. and N.B. carried out simulations and data analysis. P.J. and C.C.  
245 performed the CRLB calculations. N.B. developed the (d)STORM buffer. N.B., C.C. and P.J. optimized  
246 the immunofluorescence protocol. P.J. and C.C. prepared the COS-7 cells samples, C.L. prepared the  
247 neuron samples, A.B., M.-A. B.-D. and B.V. prepared the bacteria samples. All authors contributed to  
248 writing the manuscript.

249 **Competing financial interests**

250 N.B., E.F. and S.L.F. are shareholders in Abbelight.

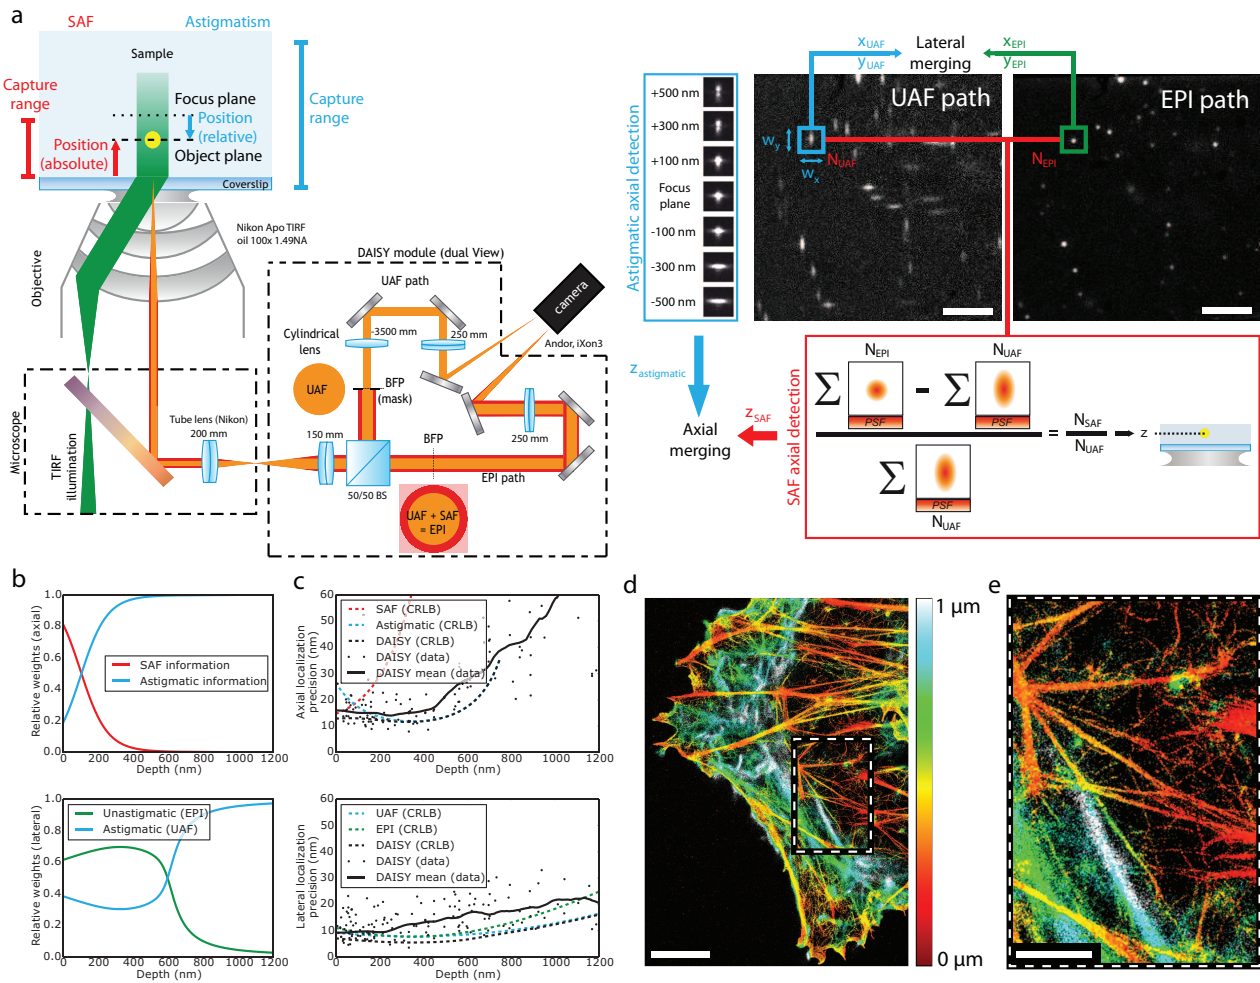

**Figure 1:** Description of the principle of DAISY and characterization of the precision. **(a)** Schematic of the setup. The DAISY module is placed between the microscope and the camera. After the beam splitter cube (BS), the Undercritical Angle Fluorescence (UAF) path contains a cylindrical lens, as well as a physical mask in a relay plane of the back focal plane of the objective to block the SAF photons. These two elements are not present in the epifluorescence (EPI) detection path, which comprises both the UAF and SAF components. The images are formed on the two halves of the same camera. UAF and EPI frames recorded by the camera on a given field (COS-7 cells,  $\alpha$ -tubulin immunolabeling, Alexa Fluor 647) are also displayed (top right corner). For each PSF, the  $x$  and  $y$  widths are measured to obtain the astigmatic axial information, and the numbers of UAF and EPI photons are used to retrieve the SAF axial information. Finally, the axial astigmatic and SAF positions are merged together. Similarly, lateral positions are obtained by merging the lateral positions from the UAF and EPI paths. **(b)** Relative weights of the SAF and astigmatic axial detections (top) and of the UAF and EPI lateral positions (bottom) used to merge the positions in DAISY (see **Methods, Position merging** section for the exact formulas). **(c)** Axial (top) and lateral (bottom) precisions of DAISY. The experimental data was taken on dark red 40 nm fluorescent beads distributed at various depths, each emitting a total number of UAF photons around 5500 (similar to Alexa Fluor 647). 500 frames were acquired and the precisions were evaluated from the dispersion of the results for each bead. The Cramér-Rao Lower Bound (CRLB) contributions of each detection modality are also displayed, as well as the CRLB of DAISY for typical experimental conditions. **(d)** 3D (color-coded depth) DAISY image of actin (COS-7 cell, AF647-phalloidin labeling). **(e)** Zoom on the boxed region displayed in (d). Scale bars: 5  $\mu\text{m}$  (a) and (d), 2  $\mu\text{m}$  (e).

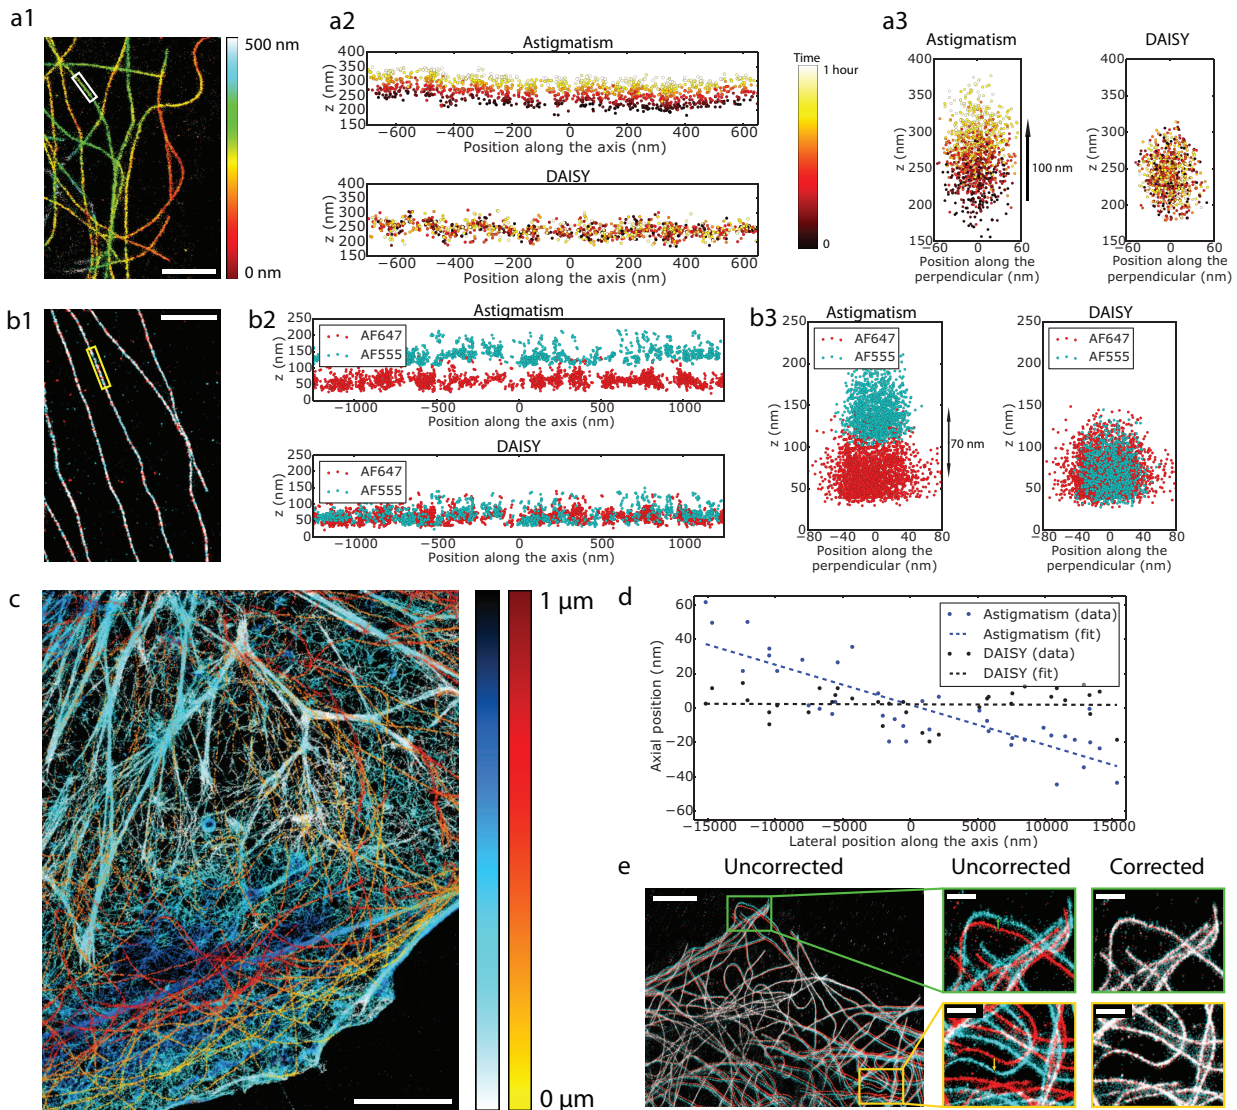

**Figure 2:** Characterization of the performance of DAISY. **(a)** Illustration of the effect of axial drifts. **(a1)** depth map of microtubules (COS-7 cells,  $\alpha$ -tubulin labeled with AF647). The  $x$ - $z$  **(a2)** and  $y$ - $z$  **(a3)** profiles of the boxed microtubule are plotted for both standard astigmatic imaging and DAISY. The time is color-coded over one hour to highlight the effect of the temporal drift. **(b)** Effect of the chromatic aberration. **(b1)** 2D localization image of microtubules (COS-7 cells,  $\alpha$ -tubulin labeled with AF555 and  $\beta$ -tubulin labeled with AF647) sequentially imaged in two different colors (red: AF647, cyan: AF555). The  $x$ - $z$  **(b2)** and  $y$ - $z$  **(b3)** profiles of the boxed microtubule are plotted for both standard astigmatic imaging and DAISY. **(c)** Dual-color depth map of actin (cyan-blue) and tubulin (yellow-red) in COS-7 cells (actin labeled with AF647-phalloidin and  $\alpha$ -tubulin labeled with a 560-nm excitable DNA-PAINT imager). **(d)** Influence of the sample tilt on the axial detection. The same field of 20 nm dark red fluorescent beads deposited on a coverslip was imaged with both standard astigmatic imaging and DAISY and the results were averaged over 500 frames to suppress the influence of the localization precision. The detected depth profile is plotted along the tilt axis. **(e)** Illustration of the image deformation induced by the astigmatism. For the same acquisition (COS-7 cells,  $\alpha$ -tubulin labeled with AF647), 2D images were reconstructed from the lateral positions measured on both the astigmatic UAF (in cyan) and the unastigmatic EPI (in red) detection paths of our setup, before the deformation correction (left) and after (right). The whole field and zooms on the boxed regions are both displayed. Scale bars: 2  $\mu\text{m}$  **(a1)** and **(b1)**, 5  $\mu\text{m}$  **(c)** and **(e)** left, 1  $\mu\text{m}$  **(e)** right insets.



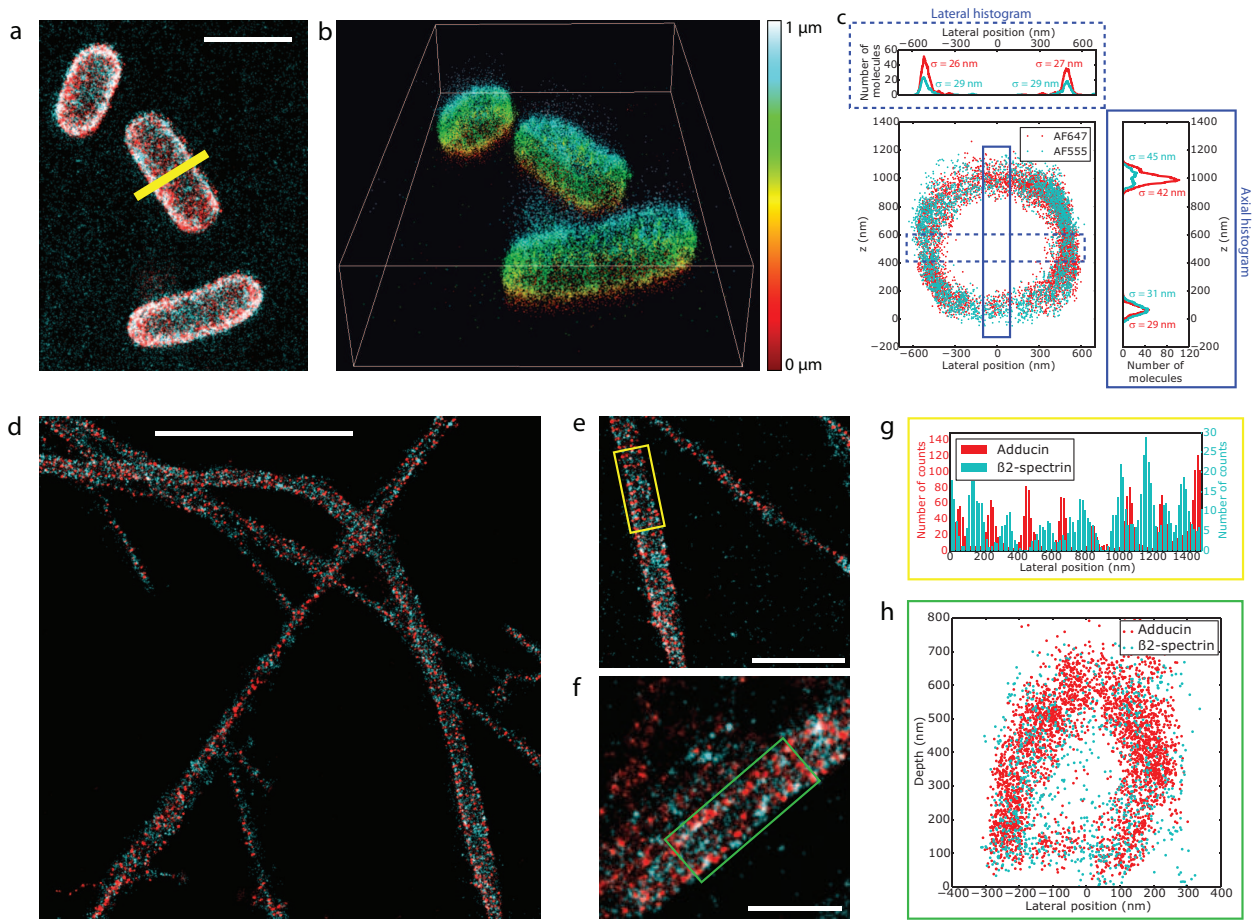

**Figure 3:** DAISY results obtained from biological samples. **(a)** 2D SMLM image of living *E. coli* bacteria labeled with both AF647 (red) and AF555 (cyan) at the membrane. **(b)** 3D view of the field displayed in **(a)**. The depth is color-coded (one single colormap is used for both AF647 and AF555). **(c)**  $x$ - $z$  slice along the line displayed in **(a)** and axial and lateral profiles in the boxed regions. The  $\sigma$  values stand for the standard deviations of the distributions. **(d-f)** 2D dual-color images of rat hippocampal neurons where the adducin and the  $\beta$ 2-spectrin were labeled with AF647 and AF555 respectively. **(g)** Lateral profile along the axis of the yellow box displayed in **(e)**. **(h)**  $x$ - $z$  slice along the green box displayed in **(f)**. Scale bars: 2  $\mu\text{m}$  **(a)** and **(e)**, 5  $\mu\text{m}$  **(d)**, 1  $\mu\text{m}$  **(f)**.

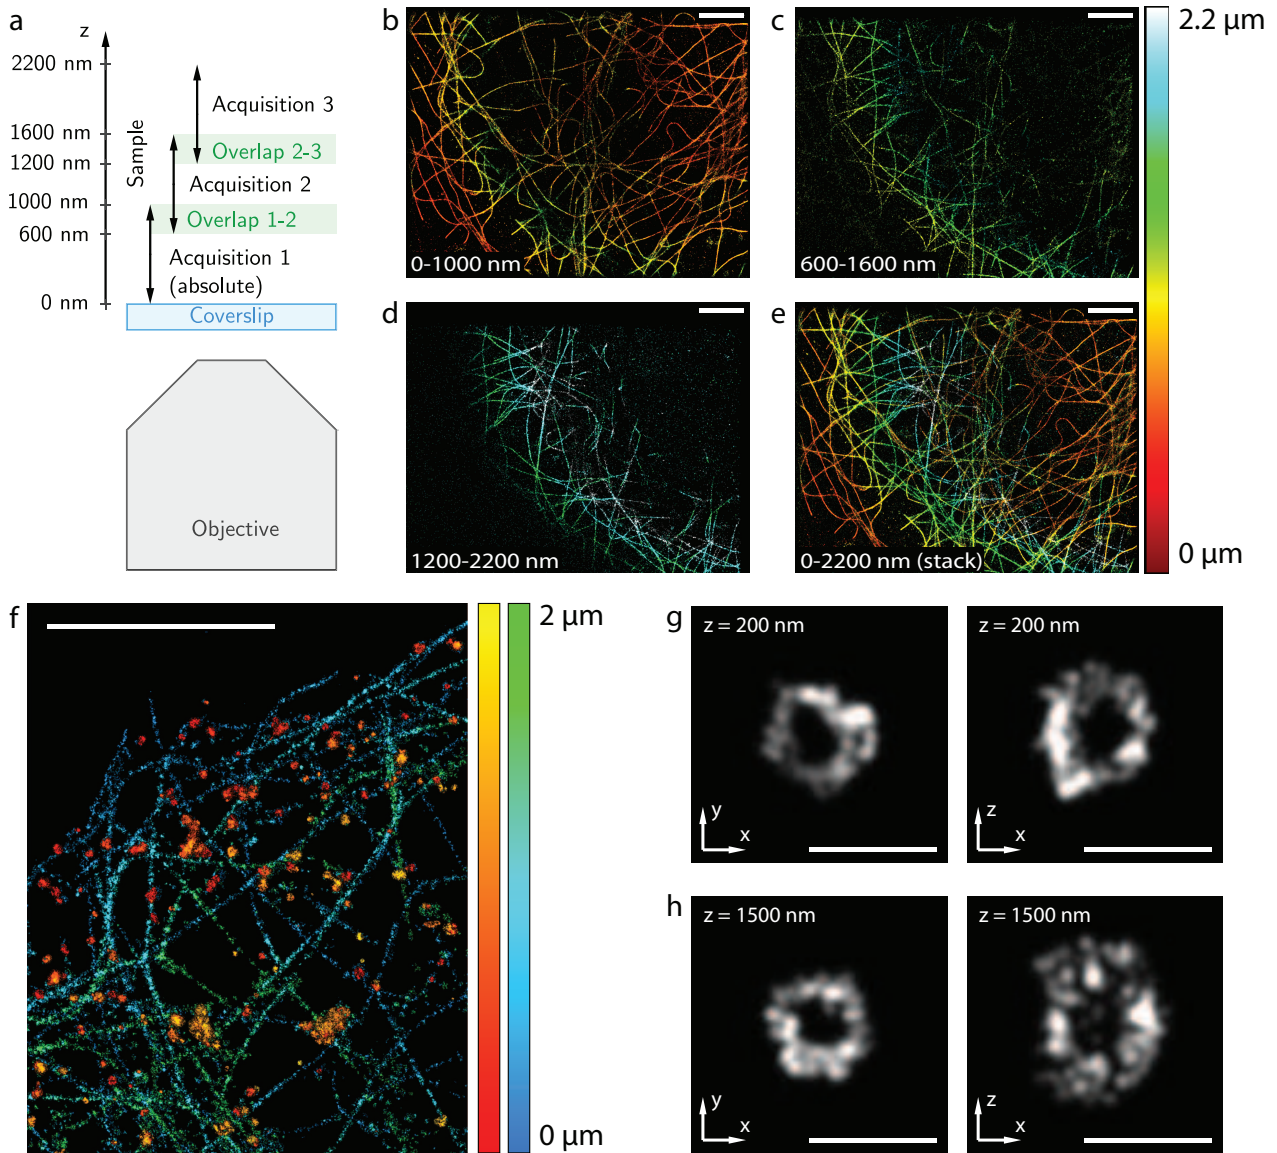

**Figure 4:** Extended depth imaging principle and results. **(a)** Description of the acquisition protocol: several sequential acquisitions are performed at different focus positions with a sufficient overlap between them to enable the stitching of the different slices (the focus is typically shifted by 600 nm between successive acquisitions, while the capture range is around 1  $\mu\text{m}$  for each acquisition). **(b–d)** 3D images reconstructed from single-color tubulin acquisitions performed at different focus positions (COS-7 cells,  $\alpha$ - and  $\beta$ -tubulin labeled with AF647). **(e)** Final 3D image obtained by stitching the three consecutive acquisitions. The total range is around 2.2  $\mu\text{m}$ . **(f)** 3D extended range dual-color image of clathrin (red-yellow) and tubulin (blue-green) obtained from three sequential acquisitions at different heights (COS-7 cells, heavy chain and light chain clathrin labeled with AF647,  $\alpha$ - and  $\beta$ -tubulin labeled with a 560-nm excitable DNA-PAINT imager). **(g–h)** x-y and x-z slices of two clathrin spheres taken from (f) at two different depths (200 nm and 1500 nm). Scale bars: 5  $\mu\text{m}$  (b–f), 500 nm (g–h).

## 251 Methods

252 **Optical setup.** A schematic of the optical setup used is presented in **Fig. 1a**. We used a Nikon Eclipse  
253 Ti inverted microscope with a Nikon Perfect Focus System. The excitation was performed thanks to  
254 five different lasers: 637 nm (Obis 637LX, 140 mW, Coherent), 561 nm (Genesis MX 561 STM, 500  
255 mW), 532 nm (Verdi G5, 5 W, Coherent), 488 nm (Genesis MX 488 STM, 500 mW, Coherent) and  
256 405 nm (Obis 405LX, 100 mW, Coherent). The corresponding 390/482/532/640 or 390/482/561/640  
257 multiband filters (LF405/488/532/635-A-000 and LF405/488/561/635-A-000, Semrock) were used.  
258 The fluorescence was collected through a Nikon APO TIRF x100 1.49 NA oil immersion objective  
259 lens, sent in the DAISY module and recorded on two halves of a 512x512-pixel EMCCD camera  
260 (iXon3, Andor). The camera was placed at the focal plane of the module of magnification 1.67 and the  
261 optical pixel size was approximately 100 nm. Finally, the imaging paths were calibrated in intensity  
262 to compensate the non-ideality of the 50-50 beam splitter as well as the reflection on the cylindrical  
263 lens surface (this measurement was performed for each fluorescence wavelength). The object focal  
264 plane of the EPI path was typically at the coverslip ( $z = 0$  nm) and the UAF path had two focal lines,  
265 at  $z = 0$  nm and  $z = 800$  nm for the  $y$  and  $x$  axes respectively.

266 **Sample preparation.** COS-7 cells were grown in DMEM with 10% FBS, 1% L-glutamin and 1% peni-  
267 cillin/streptomycin (Life Technologies) at 37°C and 5% CO<sub>2</sub> in a cell culture incubator. Several days  
268 later, they could be plated at low confluency on cleaned round 25 mm diameter high resolution #1.5  
269 glass coverslips (Marienfield, VWR). After 24 hours, the cells were washed three times with PHEM  
270 solution (60 mM PIPES, 25 mM HEPES, 5 mM EGTA and 2 mM Mg acetate adjusted to pH 6.9 with  
271 1 M KOH) and fixed for 12 min in 4% PFA, 0.2% glutaraldehyde and 0.5% Triton; they were then  
272 washed 3 times in PBS (Invitrogen, 003000). Up to this fixation step, all chemical reagents were pre-  
273 warmed at 37°C. The cells were post-fixed for 10 min with PBS + 0.1% Triton X-100, reduced twice  
274 for 10 min with NaBH<sub>4</sub>, and washed in PBS three times before being blocked for 15 min in PBS + 1%  
275 BSA.

276 The labeling step varied according to the required sample: in the case of actin labeling, the cells were  
277 incubated for 20 minutes with 3.3 nM phalloidin-AF647 (Thermo Fisher, A22287) in the (d)STORM  
278 imaging buffer (Abbelight) before starting the acquisition—without removing the (d)STORM buffer  
279 containing the phalloidin-AF647. On the contrary, immunolabeling of tubulin and clathrin required  
280 more preparation steps.

281 For AF647  $\alpha$ -tubulin, the cells were incubated for 1 hour at 37°C with 1:300 mouse anti- $\alpha$ -tubulin  
282 antibody (Sigma Aldrich, T6199) in PBS + 1% BSA. This was followed by three washing steps in PBS +  
283 1% BSA, incubation for 45 min at 37°C with 1:300 goat anti-mouse AF647 antibody (Life Technologies,  
284 A21237) diluted in PBS 1% BSA and three more washes in PBS.

285 For AF647  $\beta$ -tubulin and AF555  $\alpha$ -tubulin, the cells were incubated for 1 hour at 37°C with 1:300  
286 rabbit anti- $\beta$ -tubulin antibody (Sigma Aldrich, T5293) in PBS + 1% BSA. This was followed by three  
287 washing steps in PBS + 1% BSA, incubation for 45 min at 37°C with 1:300 goat anti-rabbit AF555  
288 antibody (Life Technologies, A21430) diluted in PBS + 1% BSA and three more washes in PBS + 1%  
289 BSA. Then they were incubated again for 1 hour at 37°C with 1:300 mouse anti- $\alpha$ -tubulin antibody  
290 (Sigma Aldrich, T6199) in PBS + 1% BSA, washed three times, incubated for 45 min at 37°C with 1:300  
291 goat anti-mouse AF647 antibody (Life Technologies, A21237) diluted in PBS + 1% BSA and washed  
292 three more washes in PBS.

293 For AF647  $\alpha$ - and  $\beta$ -tubulin, the cells were incubated for 1 hour at room temperature with 1:300  
294 mouse  $\beta$ -tubulin antibody (Sigma Aldrich, T5293) in PBS + 1% BSA. This was followed by three  
295 washing steps in PBS + 1% BSA, incubation for 1 hour at 37°C with 1:300 mouse  $\alpha$ -tubulin antibody  
296 (Sigma Aldrich, T6199) diluted in PBS 1% BSA, three more washes in PBS + 1% BSA, incubation for  
297 45 min at 37°C with 1:300 goat anti-mouse AF647 antibody (Life Technologies, A21237) diluted in  
298 PBS 1% BSA and three more washes in PBS.

299 For AF647 heavy chain and light chain clathrin and DNA-PAINT  $\alpha$ - and  $\beta$ -tubulin, the cells were  
300 incubated for 1 hour at 37°C with 1:400 mouse anti-light chain clathrin antibody (Sigma Aldrich,  
301 C1985) in PBS + 1% BSA and washed three times with PBS + 1% BSA, incubated again for 1 hour  
302 at 37°C with 1:400 mouse anti-heavy chain clathrin antibody (Sigma Aldrich, C1860) in PBS + 1%

303 BSA and washed three times with PBS + 1% BSA. Then they were incubated for 45 min at 37°C with  
304 1:400 anti-mouse AF647 antibody (Life Technologies, A21237) in PBS + 1% BSA, washed three times  
305 with PBS + 1% BSA, and incubated again for 1 hour at room temperature with 1:400 mouse  $\beta$ -tubulin  
306 antibody (Sigma Aldrich, T5293) in PBS + 1% BSA. This was followed by three washing steps in PBS  
307 + 1% BSA, incubation for 1 hour at 37°C with 1:400 mouse  $\alpha$ -tubulin antibody (Sigma Aldrich, T6199)  
308 diluted in PBS 1% BSA, three more washes in PBS + 1% BSA, incubation for 2 hours at 37°C with 1:100  
309 anti-mouse-D1 Ultivue secondary antibody diluted in antibody dilution buffer (Ultivue) and washed  
310 three more washes in PBS.

311 In any case, after the immunolabeling of tubulin and/or clathrin, a post-fixation step was performed  
312 using PBS with 3.6% formaldehyde for 15 min. The cells were washed in PBS three times and then  
313 reduced for 10 min with 50 mM  $\text{NH}_4\text{Cl}$  (Sigma Aldrich, 254134), followed by three additional washes  
314 in PBS.

315 To prepare the neuron samples, rat hippocampal neurons from E18 pups were cultured on 18 mm  
316 coverslips at a density of 6,000/cm<sup>2</sup> according to previously published protocols [29] and following  
317 guidelines established by the European Animal Care and Use Committee (86/609/CEE) and ap-  
318 proval of the local ethics committee (agreement D18-055-8). After 16 days in culture, neurons were  
319 fixed using 4% PFA in PEM (80 mM Pipes, 5 mM EGTA, and 2 mM  $\text{MgCl}_2$ , pH 6.8) for 10 min. After  
320 rinses in 0.1 M phosphate buffer (PB), neurons were blocked for 60 minutes at r. t. in immuno-  
321 cytochemistry buffer (ICC: 0.22% gelatin, 0.1% Triton X-100 in PB). Following this, neurons were  
322 incubated with a chicken primary antibody against map2 (abcam, ab5392) mouse primary antibody  
323 against  $\beta$ 2-spectrin (BD Bioscience, 612563) and a rabbit primary antibody against adducin (abcam,  
324 ab51130) diluted in ICC overnight at 4°C, then after ICC rinses with AF 488, 555 and 647 conjugated  
325 secondary antibodies for 1h at 23°C.

326 The *E. coli* K12 (MG1655) cells were grown in 2YT medium (Sigma, Tryptone 16.0 g/L, Yeast extract  
327 10.0 g/L, NaCl 5.0 g/L) at 37°C under agitation (180 rpm). Overnight cultures were diluted 100 times  
328 in fresh medium (final volume 300  $\mu\text{L}$ ) containing Kdo-N<sub>3</sub> (1.0 mM). Bacteria were incubated at 37°C  
329 for 9 hours under agitation (180 rpm). Then 200  $\mu\text{L}$  of the obtained suspension were washed 3 times  
330 with PBS buffer (200  $\mu\text{L}$ , 12,000 rpm, 1 min, r. t.). The pellet was re-suspended in 200  $\mu\text{L}$  of a solution  
331 of DBCO-Sulfo-Biotin (JenaBioscience, CLK-A116) (0.50 mM in PBS buffer) and the suspension was  
332 vigorously agitated for 90 min at room temperature. Bacteria were washed 3 times with PBS buffer  
333 (200  $\mu\text{L}$ , 12,000 rpm, 1 min, r. t.). The pellet was re-suspended in a solution of Streptavidin-AF647  
334 / Streptavidin-AF555 (20  $\mu\text{g}/\text{mL}$  each) (Invitrogen, ThermoFischer Scientific, S21374 and S32355) in  
335 PBS containing BSA (1.0 mg/mL, 200  $\mu\text{L}$ ) and the suspension was agitated at room temperature for  
336 90 min in the dark. Bacteria were then washed 3 times with PBS buffer (200  $\mu\text{L}$ , 12,000 rpm, 1 min, r.  
337 t.). The pellet was re-suspended in PBS buffer (400  $\mu\text{L}$ ) and stored at 4°C until analysis.

338 **Fluorescent beads sample preparation.** 20-nm fluorescent dark red beads samples were prepared  
339 using a  $5.10^{-7}$  dilution of the initial solution (F8783, Thermo Fisher). We performed the dilution in  
340 PBS + 5% glucose to match the index of the dSTORM imaging buffer, and we waited for 5 min before  
341 starting the acquisition so that the beads had time to deposit on the coverslip.

342 100-nm diameter tetraspeck fluorescent beads samples were prepared by diluting the initial solution  
343 (T7279, Thermo Fisher) at  $5.10^{-4}$  in PBS + 5% glucose, and we waited for 5 min before starting the  
344 acquisition for the beads to deposit on the coverslip.

345 For the 40-nm diameter dark red fluorescent beads sample preparation, refer to the **Localization**  
346 **precision measurement** section.

347 **Image acquisition.** (d)STORM/DNA-PAINT imaging on biological samples was performed using an  
348 oblique epifluorescence illumination configuration. To induce most of the molecules in a dark state,  
349 we used either a (d)STORM buffer (Abbelight Smart kit) or a dilution of DNA-PAINT imagers in  
350 imaging buffer. In both cases, the sample was lit with an irradiance of approximately 4 kW.cm<sup>-2</sup> until  
351 a sufficient density of molecules was obtained—typically below one molecule per 4  $\mu\text{m}^2$  (see **Sup-**  
352 **plementary Note 1** for a study of the influence of the molecule density per frame on the localization  
353 performance). We then started the data acquisition with 50-ms (for AF647) or 100-ms (for AF555 and

354 DNA-PAINT imagers) exposure time and 150 EMCCD gain. The total number of acquired frames  
355 was typically between 15,000 and 30,000 per acquisition.  
356 Performance measurements on fluorescent beads were done at low illumination powers (0.15  
357  $\text{kW.cm}^{-2}$  for 20-nm diameter dark red beads and  $0.025 \text{ kW.cm}^{-2}$  for tetraspeck beads and 40-nm di-  
358 ameter dark red beads). The beads were immersed in PBS + 5% glucose and the exposure times and  
359 EMCCD gain were 50 ms and 150 respectively. Except for the long-term axial drift tracking experi-  
360 ment, 500 frames were recorded for each performance characterization acquisition.  
361 The acquisition was performed using the Nemo software (Abbelight).

362 **Localization software.** Each  $512 \times 512$ -pixel frame was pre-processed by removing the pixel per pixel  
363 temporal median of the previous 10 frames in order to get rid of the slowly varying background  
364 without altering the number of photons in the PSFs. The filtered frames were then split in two  
365 parts corresponding to the UAF and EPI paths of the DAISY module respectively. On the  $512 \times 256$ -  
366 pixel sub-frames, the PSFs were detected using a second order wavelet filtering associated with an  
367 intensity threshold (typically 1.0 for the EPI channel, 0.8 for the UAF channel). Each PSF was char-  
368 acterized using a center of mass detection to retrieve the lateral positions  $x^{EPI}$ ,  $y^{EPI}$ ,  $x^{UAF}$  and  $y^{UAF}$ ,  
369 and a Gaussian fitting to assess the PSF widths  $w_x^{UAF}$ ,  $w_y^{UAF}$ ,  $w_x^{EPI}$  and  $w_y^{EPI}$ . A photon counting  
370 was also performed over a  $2 \mu\text{m} \times 2 \mu\text{m}$  square area centered on the PSF to determine the num-  
371 ber of photons  $N^{EPI}$  and  $N^{UAF}$ . A filtering step based on photon numbers (typically 500 photons  
372 minimum for AF647), EPI PSF widths ( $80 \text{ nm} < \sqrt{w_x^{EPI} w_y^{EPI}} < 180 \text{ nm}$ ) and EPI PSF anisotropy  
373 ( $0.67 < w_x^{EPI} / w_y^{EPI} < 1.5$ ) was then operated to get rid of false positive detections. Furthermore,  
374 pairs of localizations closer than  $2 \mu\text{m}$  were discarded to avoid biases due to the signal from neigh-  
375 bouring PSFs. Corrections were applied to photon numbers (as mentioned in the **Optical setup**  
376 section) and lateral positions  $x^{UAF}$  and  $y^{UAF}$  (to compensate the image deformation induced by the  
377 astigmatism as illustrated in **Fig. 2e**). Afterwards, the axial positions were calculated: the values of  
378  $z^{SAF}$  were obtained using the theoretical curve provided in [15] whereas those of  $z^{astigmatic}$  could be  
379 retrieved by fitting  $w_x^{UAF} - w_y^{UAF}$  to the calibration curve (see the **Astigmatism calibration** section)  
380 using a least squares calculation. Lateral drifts were then corrected using a temporal cross-correlation  
381 algorithm.

382 Finally, the values of  $z^{SAF}$  and  $z^{astigmatic}$  were merged together, as well as the values of  $x^{EPI}$  and  $x^{UAF}$ ,  
383  $y^{EPI}$  and  $y^{UAF}$  (as described in the **Position merging** section).  
384 All this processing was performed using a home-written Python code.

385 **Astigmatism calibration.** Although in the literature, the calibration of axial detection methods is  
386 often performed by using fluorescent beads deposited on a coverslip and defocusing the objective,  
387 this method is biased since it does not take into account the effect of the spherical aberration, which  
388 affects both the position of the focal plane (the so-called focal shift) and the shapes of the PSFs. While  
389 the former can be compensated using a calculated correction factor depending on several experimen-  
390 tal parameters, there is no simple way to get to correct the latter to our knowledge. Thus we chose to  
391 perform the calibration of the astigmatic detection using a sample of known geometry in the nomi-  
392 nal acquisition conditions, i.e. with a fixed focus plane and dSTORM fluorophores. More specifically,  
393 we used a sample of  $15 \mu\text{m}$  microspheres decorated with fluorophores (either AF647 or AF555), as  
394 described in [20]. By measuring the position of the center and the radius of the spheres, it is possible  
395 to calculate the expected axial position of each molecule from the measurement of its lateral position.  
396 Such an acquisition provides the lookup table giving the correspondence between PSF widths and  
397 axial positions.

398 **Astigmatism correction algorithm.** Before combining the two sources of axial information, the astig-  
399 matic positions were corrected in order to make them benefit from the SAF absolute detection. This  
400 was done thanks to a cross-correlation algorithm between the SAF and astigmatic positions mea-  
401 sured for each molecule. As the SAF detection is efficient mostly close to the coverslip, we restricted  
402 the data to the subset of molecules verifying  $z^{SAF} \in [-50 \text{ nm}, 400 \text{ nm}]$  in order to perform the cross-  
403 correlation in the domain where both axial information sources are precise and reliable.

404 First, we removed the tilt: the  $z^{SAF} - z^{astigmatic}$  axial discrepancy was calculated for each molecule  
405 from the data verifying  $z^{SAF} \in [-50 \text{ nm}, 400 \text{ nm}]$ . The spatially resolved axial discrepancy informa-  
406 tion was used to calculate the tilt by fitting a plane to the data, which provided the tilt direction and  
407 amplitude. The astigmatic positions were corrected in accordance with this result.

408 Then data was divided in subsets of 1,000 frames and distributed in series of 3D images with 100  
409 nm lateral and 15 nm axial pixel sizes, each of them corresponding to a 1,000 frame subset. For each  
410 subset, the SAF and astigmatism 3D images were cross-correlated allowing only axial displacements  
411 to maximize the overlap, which brought the correction to be applied to the astigmatic positions for  
412 the subset. Then the results obtained for all the subsets were pooled and interpolated to generate the  
413 axial drift curve. Thanks to this correction, the astigmatic results were made absolute (i.e. referenced  
414 to the coverslip) and insensitive to both the chromatic aberration and the axial drift.

415 It is worth noting that the 1,000-frame division corresponds to a 50-s sampling of the axial drift (with  
416 50-ms exposure time). This value seems reasonable given the slow evolution of the drift: it is the  
417 result of a compromise between the bandwidth of the correction (a finer sampling allows a better  
418 correction of higher drift frequencies) and the robustness of the algorithm (if the amount of the data  
419 is too low, the algorithm may not adequately converge or provide a wrong value). Shorter slices  
420 might be used with higher density samples. Similarly, acquisitions featuring a lower SNR or photon  
421 number would require larger pixels or larger slices to compensate the influence of the localization  
422 precision worsening. The final accuracy of the correction appears to be typically better than 6 nm  
423 (this was obtained by measuring the height of fluorophores deposited at the coverslip outside of  
424 cells).

425 **Position merging.** In DAISY acquisitions, the lateral positions were obtained by combining the two  
426 sources of lateral information according to their uncertainties (the CRLB values were used for that  
427 purpose). The exact formula follows the normal distribution combination law:

$$x^{DAISY} = \left( \frac{x^{UAF}}{(\sigma_x^{UAF})^2} + \frac{x^{EPI}}{(\sigma_x^{EPI})^2} \right) / \left( \frac{1}{(\sigma_x^{UAF})^2} + \frac{1}{(\sigma_x^{EPI})^2} \right) \quad (1)$$

$$y^{DAISY} = \left( \frac{y^{UAF}}{(\sigma_y^{UAF})^2} + \frac{y^{EPI}}{(\sigma_y^{EPI})^2} \right) / \left( \frac{1}{(\sigma_y^{UAF})^2} + \frac{1}{(\sigma_y^{EPI})^2} \right) \quad (2)$$

429 where  $\sigma_i^{UAF}$  and  $\sigma_i^{EPI}$  are the localization precisions in the direction  $i$  for the UAF and EPI detections  
430 respectively (i.e. the standard deviations of the positions).

431 Similarly, the two sources of axial information were merged according to their uncertainties:

$$z^{DAISY} = \left( \frac{z^{SAF}}{(\sigma_z^{SAF})^2} + \frac{z^{astigmatic}}{(\sigma_z^{astigmatic})^2} \right) / \left( \frac{1}{(\sigma_z^{SAF})^2} + \frac{1}{(\sigma_z^{astigmatic})^2} \right) \quad (3)$$

432 where  $\sigma_z^{SAF}$  and  $\sigma_z^{astigmatic}$  are the axial localization precisions of the SAF and the astigmatic detections  
433 respectively.

434 This combination optimizes the final precision, i.e. it provides the best precision attainable from the  
435 two sources given their respective uncertainties.

436 The relative weights used for DAISY are shown in **Fig. 1b**. It is worth noting that since localization  
437 precisions vary with depth, the corresponding weights vary accordingly. Notably, the weight of the  
438 SAF detection is more important than that of the axial astigmatic detection at the coverslip, but it  
439 quickly dwindles to almost zero after 500 nm. Similarly, the (unastigmatic) EPI detection is more  
440 precise in the first depth of field, whereas the (astigmatic) UAF detection dominates after 600 nm,  
441 where the EPI PSFs are too defocused to be detected.

442 **Localization precision measurement.** The DAISY localization precision measurements displayed in  
443 **Fig. 1c** were performed on 40-nm diameter dark red fluorescent beads (10720, Thermo Fisher) located  
444 at various heights. This was obtained by taking fixed, unlabeled COS-7 cells and adding 500  $\mu\text{L}$  of  
445 beads solution diluted at  $5 \cdot 10^{-7}$  in PBS during 5 minutes for beads to deposit before removing the

446 solution and replacing it with PBS + 5% glucose. Beads stuck on the upper side of the membrane  
447 were thus located at random heights. The results of several 500-frame acquisitions were pooled and  
448 for each of them, the lateral drift was corrected. The average axial position was measured for each  
449 bead, as well as the standard deviations on the lateral and axial measured positions, which gave the  
450 localization precisions.

451 **Cramér-Rao Lower Bound calculation.** To derive the CRLB for DAISY, we first estimated the lower  
452 bounds associated to the astigmatic and the SAF detections separately. To this end, we assumed  
453 elliptical Gaussian PSFs for the UAF image and circular Gaussian PSFs for the EPI image. We used  
454 a realistic set of parameters corresponding to typical experimental conditions with AF647, i.e. 100  
455 background photons per pixel on each path and 2800 UAF photons per PSF for each image. The  
456 CRLB of the SAF was adapted from [30] and that of the astigmatism was derived from [31]. Finally,  
457 the DAISY axial CRLB was obtained from the previous results using **equation (3)**. Similarly, the  
458 lateral CRLB for the UAF and EPI paths were obtained from [32] and the lateral lower bound of  
459 DAISY was calculated from these results using **equations (1) and (2)**. See **Supplementary Note 2** for  
460 a more exhaustive description of the CRLB calculations. These results were used to plot the curves  
461 displayed in **Fig. 1c** and **Supplementary Fig. 1**.

462 Note that the CRLB values are somewhat optimistic and that they are not necessarily expected to be  
463 reached in real experimental conditions because they do not account for optical aberrations, polar-  
464 ization effects on the PSF shape or for the ability of the localization algorithm to actually extract the  
465 best possible information.

466 **Data visualization.** The 3D view in **Fig. 3b** was obtained using the Nemo software (Abbelight).  
467 A filter based on the local density of molecules associated with a threshold was applied on **Fig. 4f-h**  
468 to remove false positive detections.

469 **Data availability.** Data are available from the corresponding authors upon reasonable request.

## 470 References

- 471 [1] E. Betzig, G. H. Patterson, R. Sougrat, O. W. Lindwasser, S. Olenych, J. S. Bonifacino, M. W.  
472 Davidson, J. Lippincott-Schwartz, and H. F. Hess, "Imaging intracellular fluorescent proteins at  
473 nanometer resolution.," *Science (New York, N.Y.)*, vol. 313, pp. 1642–5, sep 2006.
- 474 [2] S. T. Hess, T. P. K. Girirajan, and M. D. Mason, "Ultra-high resolution imaging by fluorescence  
475 photoactivation localization microscopy.," *Biophysical journal*, vol. 91, pp. 4258–72, dec 2006.
- 476 [3] M. J. Rust, M. Bates, and X. Zhuang, "Sub-diffraction-limit imaging by stochastic optical recon-  
477 struction microscopy (STORM).," *Nature Methods*, vol. 3, pp. 793–796, aug 2006.
- 478 [4] S. van de Linde, A. Löschberger, T. Klein, M. Heidbreder, S. Wolter, M. Heilemann, and M. Sauer,  
479 "Direct stochastic optical reconstruction microscopy with standard fluorescent probes.," *Nature*  
480 *protocols*, vol. 6, pp. 991–1009, jul 2011.
- 481 [5] B. Huang, W. Wang, M. Bates, and X. Zhuang, "Three-Dimensional Super-Resolution Imaging  
482 by Stochastic Optical Reconstruction Microscopy," *Science*, vol. 319, no. 5864, pp. 810–813, 2008.
- 483 [6] S. R. P. Pavani, M. A. Thompson, J. S. Biteen, S. J. Lord, N. Liu, R. J. Twieg, R. Piestun, and  
484 W. E. Moerner, "Three-dimensional, single-molecule fluorescence imaging beyond the diffrac-  
485 tion limit by using a double-helix point spread function.," *Proceedings of the National Academy of*  
486 *Sciences of the United States of America*, vol. 106, no. 9, pp. 2995–2999, 2009.
- 487 [7] S. Jia, J. C. Vaughan, and X. Zhuang, "Isotropic three-dimensional super-resolution imaging  
488 with a self-bending point spread function," *Nature Photonics*, vol. 8, pp. 302–306, mar 2014.
- 489 [8] Y. Shechtman, S. J. Sahl, A. S. Backer, and W. Moerner, "Optimal point spread function design  
490 for 3d imaging," *Physical Review Letters*, vol. 113, sep 2014.

- 491 [9] T. Ruckstuhl, J. Enderlein, S. Jung, and S. Seeger, "Forbidden light detection from single  
492 molecules," *Analytical chemistry*, vol. 72, pp. 2117–23, may 2000.
- 493 [10] C. M. Winterflood, T. Ruckstuhl, D. Verdes, and S. Seeger, "Nanometer Axial Resolution  
494 by Three-Dimensional Supercritical Angle Fluorescence Microscopy," *Physical Review Letters*,  
495 vol. 105, p. 108103, aug 2010.
- 496 [11] J. Enderlein, I. Gregor, and T. Ruckstuhl, "Imaging properties of supercritical angle fluorescence  
497 optics.," *Optics express*, vol. 19, pp. 8011–8, apr 2011.
- 498 [12] T. Barroca, K. Balaa, J. Delahaye, S. Lévêque-Fort, and E. Fort, "Full-field supercritical angle  
499 fluorescence microscopy for live cell imaging.," *Optics letters*, vol. 36, pp. 3051–3, aug 2011.
- 500 [13] T. Barroca, K. Balaa, S. Lévêque-Fort, and E. Fort, "Full-Field Near-Field Optical Microscope for  
501 Cell Imaging," *Physical Review Letters*, vol. 108, p. 218101, may 2012.
- 502 [14] D. Axelrod, "Evanescent excitation and emission in fluorescence microscopy.," *Biophysical jour-  
503 nal*, vol. 104, pp. 1401–9, apr 2013.
- 504 [15] N. Bourg, C. Mayet, G. Dupuis, T. Barroca, P. Bon, S. Lécart, E. Fort, and S. Lévêque-Fort, "Direct  
505 optical nanoscopy with axially localized detection," *Nature Photonics*, vol. 9, pp. 587–593, aug  
506 2015.
- 507 [16] J. Deschamps, M. Mund, and J. Ries, "3D superresolution microscopy by supercritical angle  
508 detection," *Optics Express*, vol. 22, p. 29081, nov 2014.
- 509 [17] A.-K. Gustavsson, P. N. Petrov, M. Y. Lee, Y. Shechtman, and W. E. Moerner, "3d single-molecule  
510 super-resolution microscopy with a tilted light sheet," *Nature Communications*, vol. 9, jan 2018.
- 511 [18] R. McGorty, J. Schnitzbauer, W. Zhang, and B. Huang, "Correction of depth-dependent aberrations  
512 in 3d single-molecule localization and super-resolution microscopy," *Optics Letters*, vol. 39,  
513 p. 275, jan 2014.
- 514 [19] Y. Li, M. Mund, P. Hoess, J. Deschamps, U. Matti, B. Nijmeijer, V. J. Sabinina, J. Ellenberg,  
515 I. Schoen, and J. Ries, "Real-time 3d single-molecule localization using experimental point  
516 spread functions," *Nature Methods*, vol. 15, pp. 367–369, apr 2018.
- 517 [20] C. Cabriel, N. Bourg, G. Dupuis, and S. Lévêque-Fort, "Aberration-accounting calibration for 3d  
518 single-molecule localization microscopy," *Optics Letters*, vol. 43, p. 174, jan 2018.
- 519 [21] X. Xu, Ke;Babcock, Hazen P; Zhuang, "Dual-objective STORM reveals three-dimensional fila-  
520 ment organization in the actin cytoskeleton," *Nature methods*, vol. 9, no. 2, pp. 185–188, 2012.
- 521 [22] Y. Wang, J. Schnitzbauer, Z. Hu, X. Li, Y. Cheng, Z.-L. Huang, and B. Huang, "Localiza-  
522 tion events-based sample drift correction for localization microscopy with redundant cross-  
523 correlation algorithm," *Optics Express*, vol. 22, p. 15982, jun 2014.
- 524 [23] A. von Diezmann, M. Y. Lee, M. D. Lew, and W. E. Moerner, "Correcting field-dependent aber-  
525 rations with nanoscale accuracy in three-dimensional single-molecule localization microscopy,"  
526 *Optica*, vol. 2, p. 985, nov 2015.
- 527 [24] A. Dumont, A. Malleron, M. Awwad, S. Dukan, and B. Vauzeilles, "Click-mediated labeling  
528 of bacterial membranes through metabolic modification of the lipopolysaccharide inner core,"  
529 *Angewandte Chemie International Edition*, vol. 51, pp. 3143–3146, feb 2012.
- 530 [25] E. Fugier, A. Dumont, A. Malleron, E. Poquet, J. M. Pons, A. Baron, B. Vauzeilles, and S. Dukan,  
531 "Rapid and specific enrichment of culturable gram negative bacteria using non-lethal copper-  
532 free click chemistry coupled with magnetic beads separation," *PLOS ONE*, vol. 10, p. e0127700,  
533 jun 2015.



- 534 [26] M.-J. Papandréou and C. Leterrier, "The functional architecture of axonal actin," *Molecular and*  
535 *Cellular Neuroscience*, may 2018.
- 536 [27] K. Xu, G. Zhong, and X. Zhuang, "Actin, spectrin, and associated proteins form a periodic cy-  
537 toskeletal structure in axons," *Science (New York, N.Y.)*, vol. 339, pp. 452–6, jan 2013.
- 538 [28] Y. Shechtman, L. E. Weiss, A. S. Backer, S. J. Sahl, and W. E. Moerner, "Precise three-dimensional  
539 scan-free multiple-particle tracking over large axial ranges with tetrapod point spread func-  
540 tions," *Nano Letters*, vol. 15, pp. 4194–4199, jun 2015.
- 541 [29] S. Kaeck and G. Banker, "Culturing hippocampal neurons," *Nature Protocols*, vol. 1, pp. 2406–  
542 2415, dec 2006.
- 543 [30] F. Balzarotti, Y. Eilers, K. C. Gwosch, A. H. Gynnå, V. Westphal, F. D. Stefani, J. Elf, and S. W. Hell,  
544 "Nanometer resolution imaging and tracking of fluorescent molecules with minimal photon  
545 fluxes," *Science*, vol. 355, pp. 606–612, dec 2016.
- 546 [31] B. Rieger and S. Stallinga, "The lateral and axial localization uncertainty in super-resolution  
547 light microscopy," *ChemPhysChem*, vol. 15, no. 4, pp. 664–670, 2014.
- 548 [32] S. Stallinga and B. Rieger, "The effect of background on localization uncertainty in single emitter  
549 imaging," in *2012 9th IEEE International Symposium on Biomedical Imaging (ISBI)*, pp. 988–991,  
550 IEEE, may 2012.

551

## Supplementary material

552

### Combining 3D single molecule localization strategies for reproducible bioimaging

553

Clément Cabriel\*, Nicolas Bourg, Pierre Jouchet, Guillaume Dupuis, Christophe Leterrier, Aurélie  
554 Baron, Marie-Ange Badet-Denisot, Boris Vauzeilles, Emmanuel Fort, Sandrine Lévêque-Fort\*\*

555

\*Corresponding author: [clement.cabriel@u-psud.fr](mailto:clement.cabriel@u-psud.fr)

556

\*\*E-mail: [sandrine.leveque-fort@u-psud.fr](mailto:sandrine.leveque-fort@u-psud.fr)

557

November 16, 2018

558

**Supplementary Figure 1:** Influence of the depth and the astigmatism amplitude on the axial and  
559 lateral Cramér-Rao Lower Bound (CRLB) theoretical limits.

560

**Supplementary Figure 2:** Long-term tracking of the axial drift.

561

**Supplementary Figure 3:** Influence of the remaining field aberrations on the axial detection after tilt  
562 correction.

563

**Supplementary Figure 4:** Comparison of the 3D performances of standard astigmatism, DONALD  
564 and DAISY on the same sample.

565

**Supplementary Note 1:** Influence of the molecule density per frame on the localization computation.

566

**Supplementary Note 2:** Fisher information and Cramér-Rao Lower Bounds.

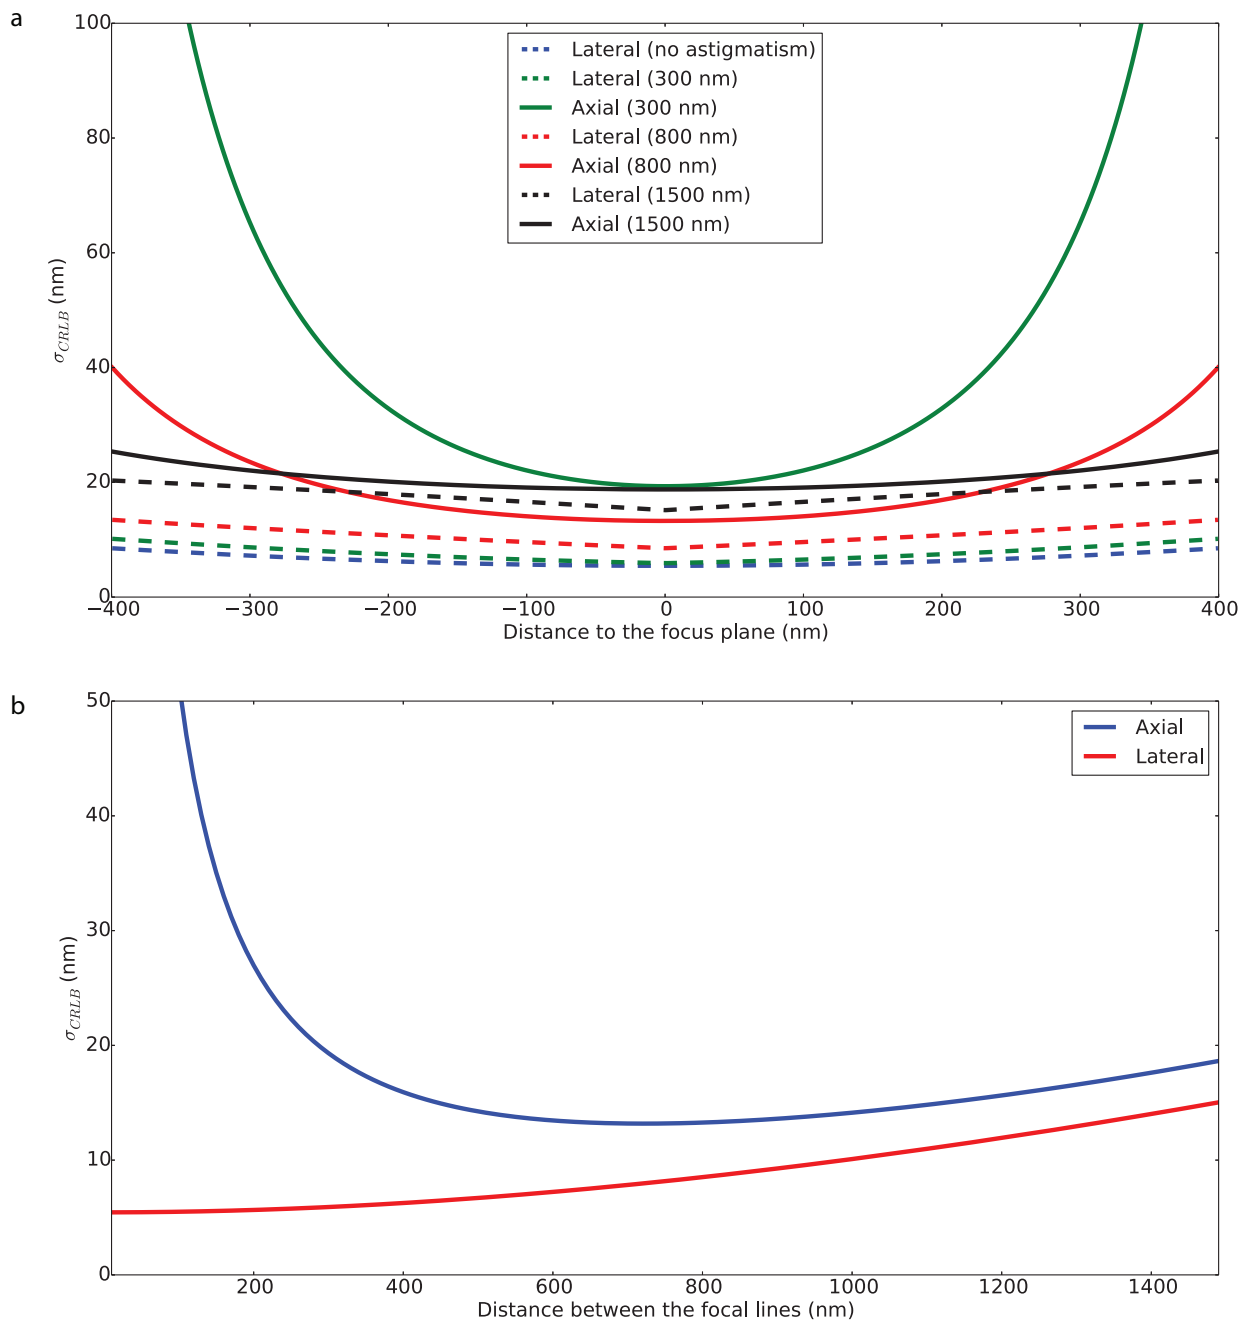

**Supplementary Figure 1:** Influence of the depth and the astigmatism amplitude on the axial and lateral Cramér-Rao Lower Bound (CRLB) theoretical limits. **(a)** Variation of the localization precision with the distance to the focal plane for different astigmatism amplitudes (expressed as the distance between the two focal lines in the object space, 300 nm being a typical value found in the literature and 800 nm being the value used for DAISY). The solid and dashed lines stand for the axial and lateral precisions respectively. See **Supplementary Note 2** for an explanation of the CRLB calculations. **(b)** Influence of the astigmatism amplitude on the best achievable axial and lateral precisions (i.e. CRLB values at  $z = 0$ ).

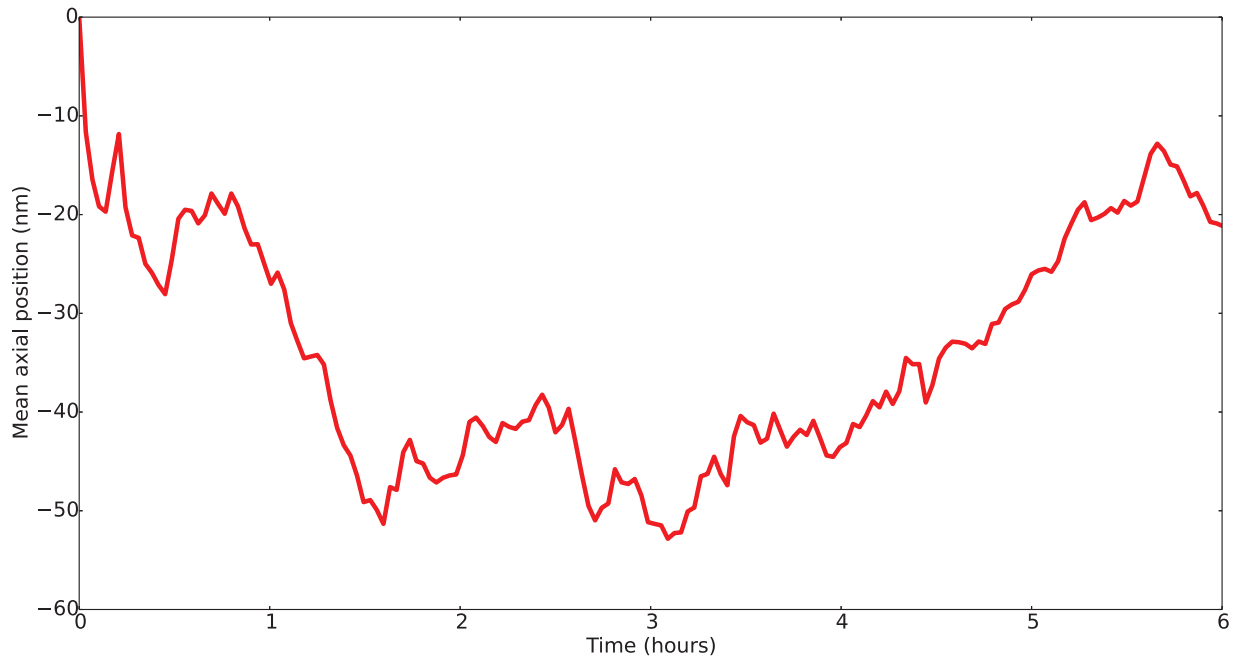

**Supplementary Figure 2:** Long-term tracking of the axial drift. The mean axial position of 100 nm diameter tetraspeck fluorescent beads (Thermo Fisher, T7279) over the imaged field is plotted as a function of time over approximately six hours. The results were averaged over 50 frames (i.e. 2.5 seconds) to suppress the influence of the localization uncertainty.

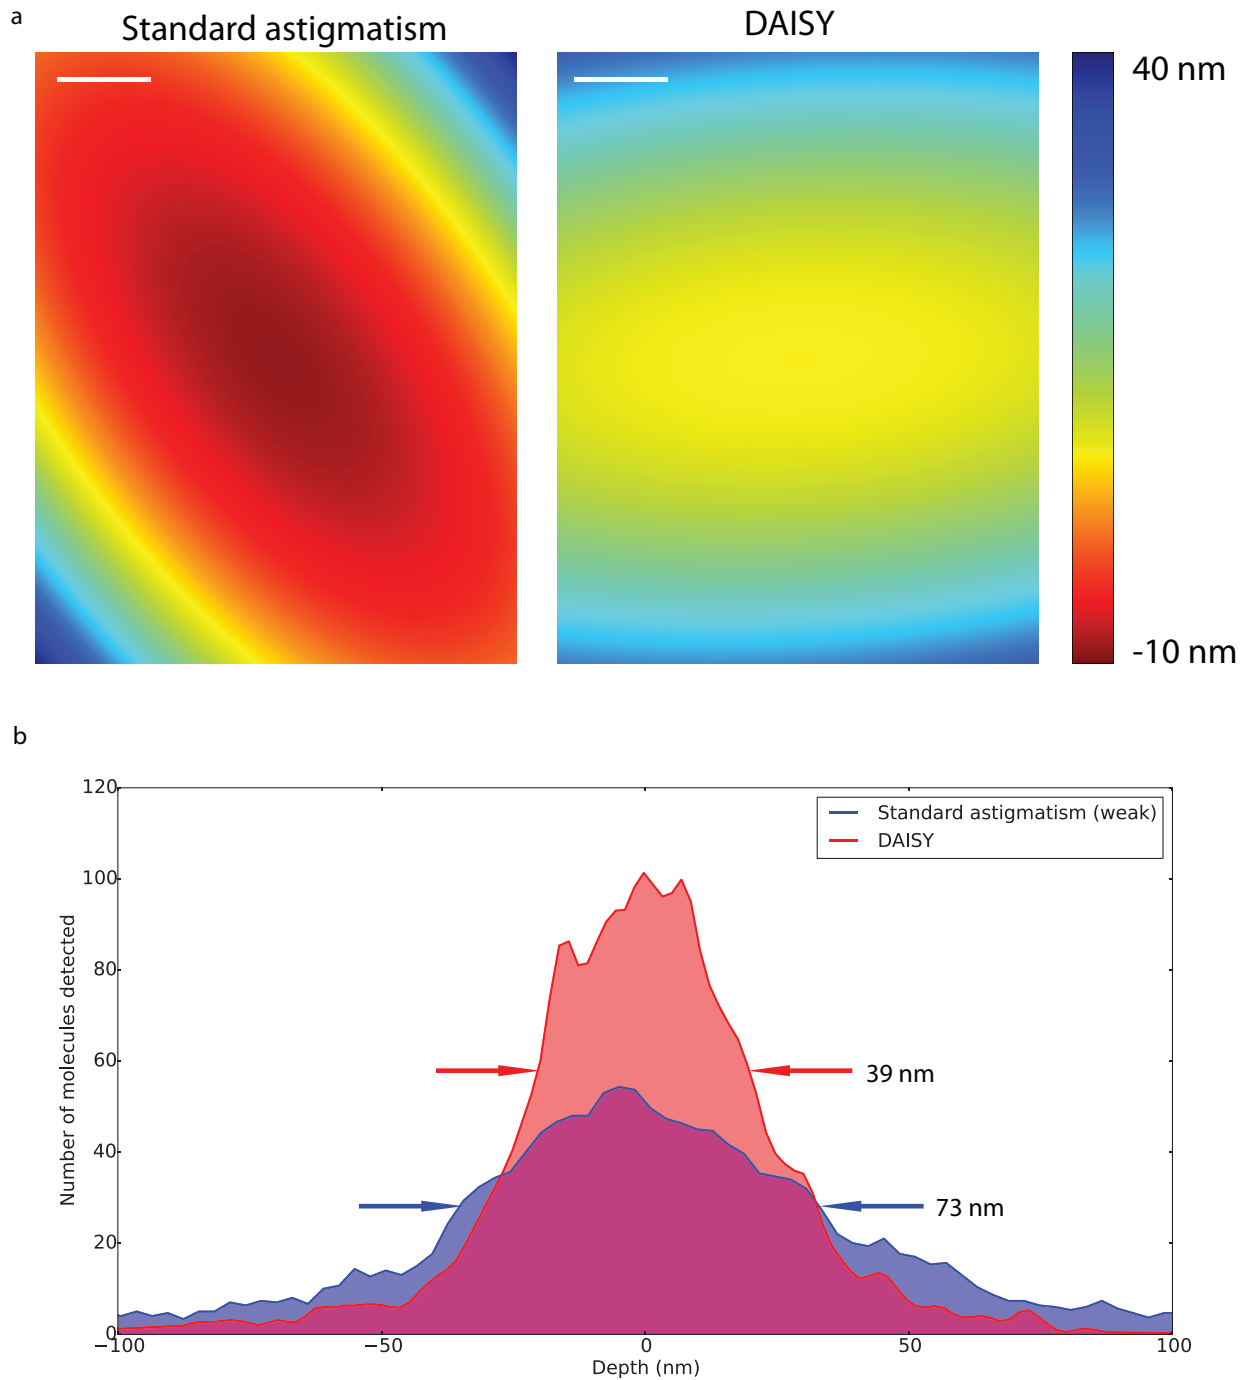

**Supplementary Figure 3:** Influence of the remaining field aberrations on the axial detection after tilt correction. **(a)** Interpolated depth maps of the axial positions measured for a sample of 20 nm dark red fluorescent beads deposited on a coverslip and averaged over 500 frames. The results are plotted for both a typical astigmatism-based imaging (300 nm spacing between the two focal lines, close to the values encountered in the literature) and for DAISY. **(b)** The depth histograms are plotted over the 30  $\mu\text{m}$  wide field for both the typical astigmatic detection (300 nm between the two focal lines) and for DAISY. The displayed widths stand for the full widths at half maximum. Scale bars: 5  $\mu\text{m}$ .

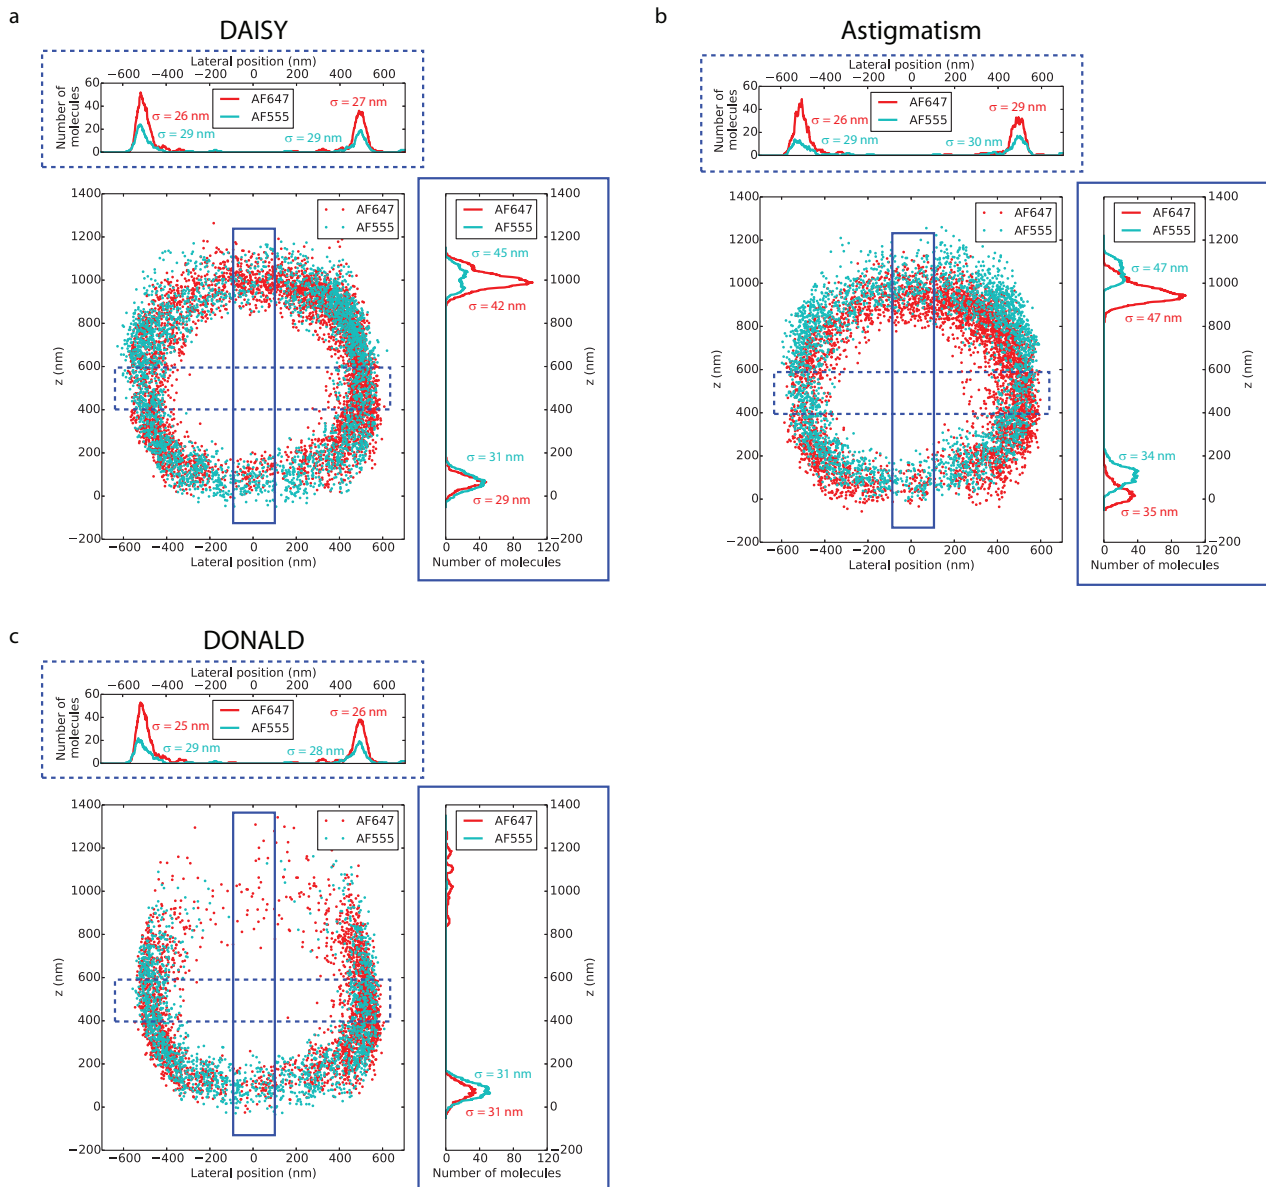

**Supplementary Figure 4: Comparison of (a) DAISY, (b) uncorrected astigmatism and (c) DONALD on a sample of living *E. coli* bacteria labeled with AF647 and AF555 at the membrane (see Fig. 3a–c and Methods). The  $x$ - $z$  slices along the line displayed in Fig. 3a and the axial and lateral profiles in the boxed regions are plotted. The  $\sigma$  values stand for the standard deviation of the distributions. Like DAISY, DONALD features an absolute detection, insensitive to both chromatic aberration and axial drift. However, the axial precision deteriorates sharply with the depth due to the decay of the SAF signal; thus the top half of the sample (beyond 600 nm) is hardly visible. Uncorrected astigmatism has the same capture range as DAISY, but since it lacks the absolute information, it exhibits an axial shift between the two colors as well as a broadening of the histogram widths due to the axial drift.**

## 567 **Supplementary Note 1: Influence of the molecule density per frame on the** 568 **localization computation**

569 To assess the impact of the molecule density per frame on the localization performance of our algo-  
570 rithm and filtering, we simulated DAISY PSFs on a 30  $\mu\text{m}$  x 30  $\mu\text{m}$  field with 100 nm pixels. The PSFs  
571 were simulated as elliptical gaussians for the UAF channel and circular gaussians for the EPI channel  
572 with realistic PSF sizes matching those of experimental data obtained with AF647. All the sources  
573 were considered at the coverslip ( $z = 0$  nm) and all the PSFs had the same intensity (2800 UAF pho-  
574 tons on each detection path). In order to decouple the effect of the molecule density from the local-  
575 ization precision, we did not add background or Poisson noise. The lateral positions were uniformly  
576 distributed over the field. The number of PSFs per frame ranged from 1 ( $1.1 \cdot 10^{-3}$  molecules/ $\mu\text{m}^2$ ) to  
577 1000 ( $1.1$  molecules/ $\mu\text{m}^2$ ). The generated positions were recorded for later use.

578 Then the localization was run on the generated data and the filters (size and anisotropy of the unas-  
579 tigmatic EPI PSFs, distance between PSF neighboring pairs) were applied and the number of re-  
580 maining detections was compared to the number of generated molecules to calculate the fraction of  
581 missed/discarded localizations (**Supplementary Fig. 5a**). Among the remaining localizations, those  
582 displaying a 3D distance to the expected position superior to 50 nm were flagged as wrong detections  
583 and their fraction among all the localizations after filtering was displayed in **Supplementary Fig. 5a**  
584 in the cases of the SAF and astigmatic detections. Finally, the lateral and axial (for the SAF and the  
585 astigmatic detections) median distances to the expected positions were displayed in **Supplementary**  
586 **Fig. 5b**.

587 As expected, the numbers of missed/discarded localizations and wrong detections increase with  
588 the density, but the latter remains quite low for reasonable densities (under 15 % below 0.3 mole-  
589 cules/ $\mu\text{m}^2$ ). Similarly, the lateral and axial position discrepancies increase with the density. Realistic  
590 dSTORM conditions correspond to densities around  $10^{-2}$ – $10^{-1}$  molecules/ $\mu\text{m}^2$ . At such densities, the  
591 number of missed/rejected localizations can account for up to 40 % of the total number of localiza-  
592 tions, but the number of wrong detections remains minimal (below 4 %). Besides, the errors on the  
593 measured positions are rather low (inferior to 4 nm in the lateral and 1 nm in the axial direction, both  
594 in SAF and astigmatism).

595 These results can prove useful to optimize the acquisition conditions—especially the composition of  
596 the imaging buffer in dSTORM, the concentration of imager strands in DNA-PAINT or the activation  
597 power in PALM, as well as the exposure time for all these methods. In DNA-PAINT acquisitions,  
598 relatively high molecule densities (up to 0.3 molecules/ $\mu\text{m}^2$ ) can be used to speed up acquisitions,  
599 as long as the localization error remains below the localization precision. On the contrary, in PALM  
600 experiments, the number of photoactivable molecules is often low and in order to minimize the  
601 number of missed/discarded molecules, the molecule density should be kept low (inferior to  $3 \cdot 10^{-2}$   
602 molecules/ $\mu\text{m}^2$ ). Depending on the sensitivity of the fluorophores used to photobleaching, dSTORM  
603 acquisitions can match either of the two previously described cases.

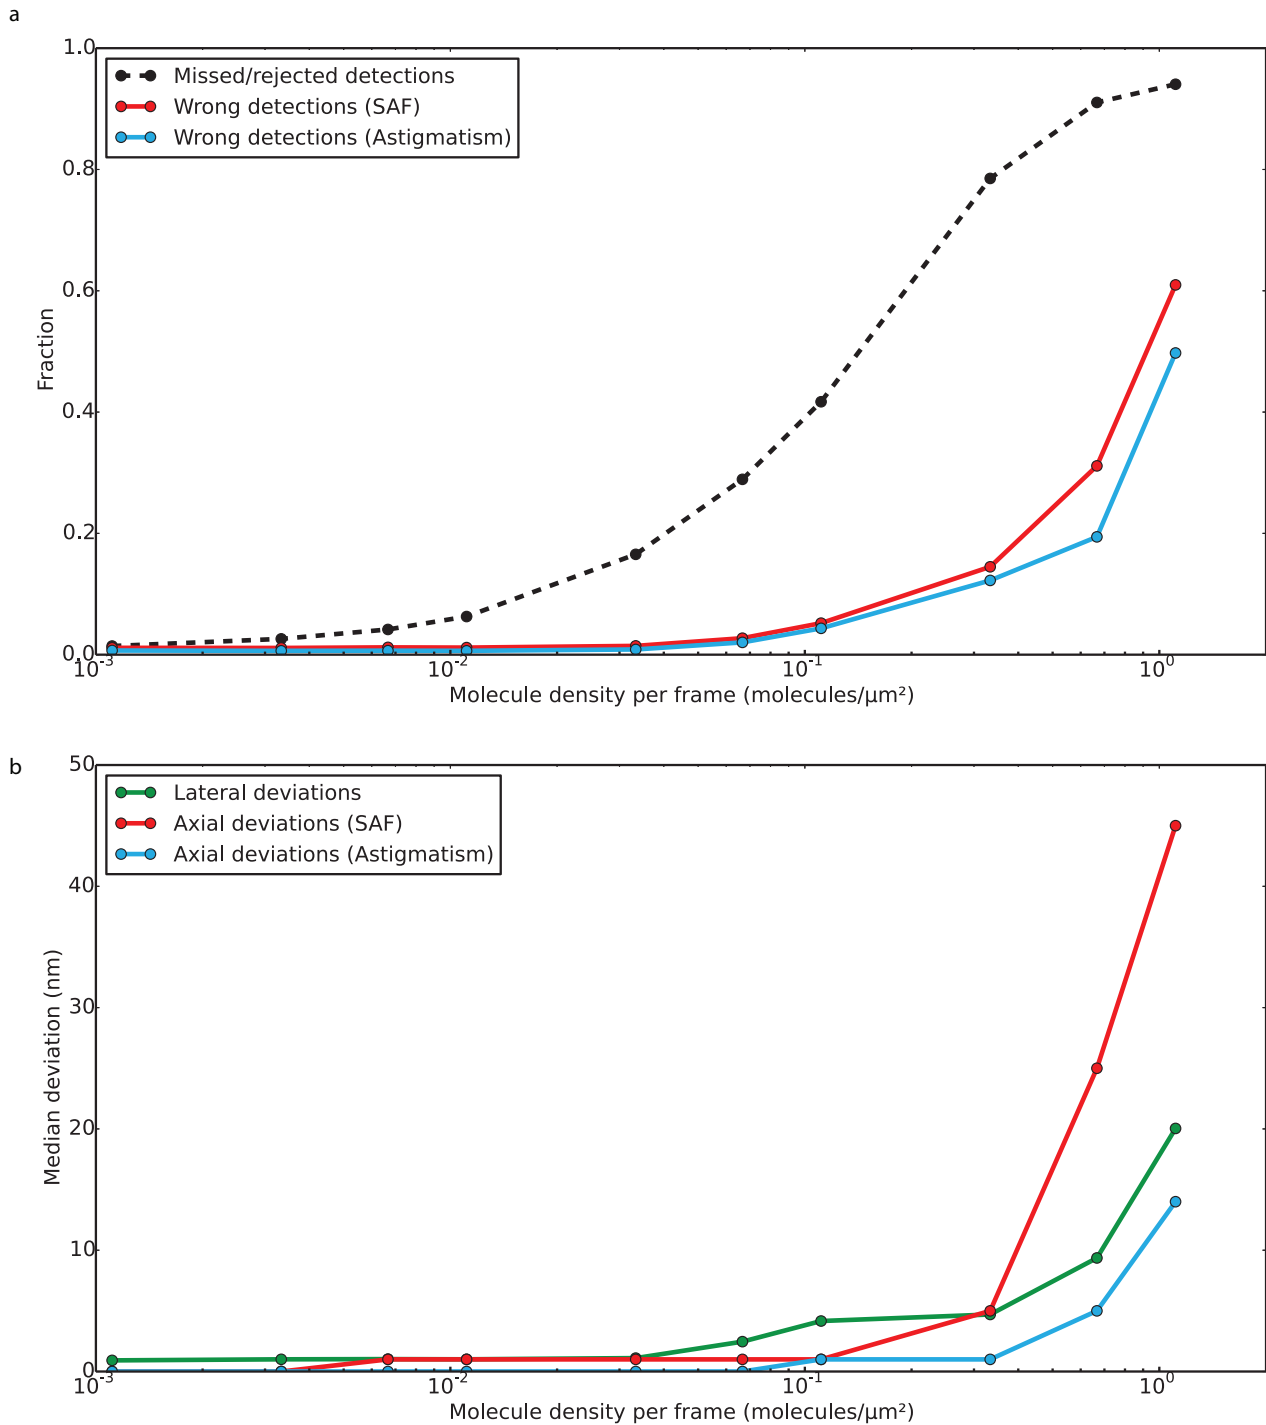

**Supplementary Figure 5:** Influence of the molecule density per frame on the localization computation. **(a)** Fraction of localizations missed or discarded (black dashed line) and fraction of wrong detections (blue and red solid lines) as a function of the molecule density on each frame. **(b)** Median lateral and axial discrepancies between the real and the measured positions as a function of the molecule density on each frame.



## 604 **Supplementary Note 2: Fisher information and Cramér-Rao Lower Bounds**

605 To determine the theoretical limits of our method, we calculated the Fisher information and the  
 606 Cramér-Rao Lower Bounds (CRLB) of both the SAF and astigmatic axial detections, as well as that of  
 607 the lateral detection in order to have access to the theoretical limits of DAISY.

### 608 **1 Fisher information and CRLB for SAF**

609 We used the same approach as Balzarotti *et al.*[1] to calculate the Fisher information for the supercrit-  
 610 ical angle fluorescence signal and the associated Cramér-Rao Lower Bounds. Considering an emitter  
 611 at the position  $\vec{r}_m$  exposed to  $K$  different illuminations, each photon acquired  $n_i$  ( $i \in [0, K - 1]$ ) fol-  
 612 lows a Poissonian statistics with a mean  $\lambda_i$  that depends on the illumination. The authors demon-  
 613 strated that the components of the parameter vector with negligible dark count can be expressed  
 614 as:

$$p_i^{(0)}(\vec{r}_m) = \frac{\lambda_i}{\sum_{j=0}^{K-1} \lambda_j} \text{ with } (i \in [0, K - 1]) \quad (\text{S.4})$$

615 Adding the background signal, this becomes:

$$p_i(\vec{r}_m) = \frac{\lambda_i + \lambda_{bi}}{\sum_{j=0}^{K-1} (\lambda_j + \lambda_{bj})} \quad (\text{S.5})$$

616 This equation can be simplified:

$$\begin{aligned} p_i(\vec{r}_m) &= \frac{SBR(\vec{r}_m)}{SBR(\vec{r}_m) + 1} \frac{\lambda_i}{\sum_{j=0}^{K-1} \lambda_j} + \frac{1}{SBR(\vec{r}_m) + 1} \frac{\lambda_{bi}}{\sum_{j=0}^{K-1} \lambda_{bj}} \\ &= \frac{SBR(\vec{r}_m)}{SBR(\vec{r}_m) + 1} p_i^{(0)} + \frac{1}{SBR(\vec{r}_m) + 1} \frac{1}{K} \end{aligned} \quad (\text{S.6})$$

617 where  $SBR(\vec{r}_m) = \frac{\sum_{j=0}^{K-1} \lambda_j}{\sum_{j=0}^{K-1} \lambda_{bj}}$  represents the signal to background ratio. Balzarotti *et al.* showed that the  
 618 Fisher matrix can be expressed in a simple form:

$$F_{\vec{r}_m} = N \sum_{i=0}^{K-1} \frac{1}{p_i} \begin{bmatrix} \left( \frac{\partial p_i}{\partial r_{m1}} \right)^2 & \cdots & \frac{\partial p_i}{\partial r_{m1}} \frac{\partial p_i}{\partial r_{md}} \\ \vdots & \ddots & \vdots \\ \frac{\partial p_i}{\partial r_{md}} \frac{\partial p_i}{\partial r_{m1}} & \cdots & \left( \frac{\partial p_i}{\partial r_{md}} \right)^2 \end{bmatrix} \quad (\text{S.7})$$

619 The Fisher information matrix gives access to a lower bound for the covariance matrix  $\Sigma(\vec{r}_m)$ . The  
 620 arithmetic mean of the eigenvalues  $\tilde{\sigma}_{CRLB}$  of the lower bound matrix is interpreted as a performance  
 621 metric:

$$\Sigma(\vec{r}_m) \geq \Sigma_{CRLB}(\vec{r}_m) = F_{\vec{r}_m}^{-1} \quad (\text{S.8a})$$

622

$$\tilde{\sigma}_{CRLB} = \sqrt{\frac{1}{d} \text{tr}(\Sigma_{CRLB}(\vec{r}_m))} \quad (\text{S.8b})$$

623 where  $d$  is the number of dimensions considered and  $N$  is the total acquired photon number.

624 These results can be transposed to our model provided a few modifications. Rather than considering  
 625 different illuminations, we consider a sampling of the signal in two parts: one (EPI signal, noted  
 626  $i = 0$ ) dependent on the  $z$  position of the emitter and one (UAF signal, noted  $i = 1$ ) independent of  
 627  $z$ . In this case, the Fisher matrix takes the form of a scalar:

$$F_z = N \left( \frac{1}{p_0} \left( \frac{\partial p_0}{\partial z} \right)^2 + \frac{1}{p_1} \left( \frac{\partial p_1}{\partial z} \right)^2 \right) \quad (\text{S.9})$$

628  $p_i(z)$  is provided by (S.6):

$$p_i(z) = \frac{SBR(z)}{SBR(z) + 1} p_i^{(0)} + \frac{0.5}{SBR(z) + 1} \quad (\text{S.10})$$

629 (S.6) can be differentiated:

$$\frac{\partial p_i(z)}{\partial z} = \frac{\partial SBR(z)}{\partial z} \frac{p_i^{(0)} - 0.5}{(SBR(z) + 1)^2} + \frac{\partial p_i^{(0)}}{\partial z} \frac{SBR(z)}{SBR(z) + 1} \quad (\text{S.11})$$

630 First, we use the theoretical dependence of the SAF signal versus the  $z$  position by performing simu-  
 631 lations based on the work of Wai Teng Tang *et al.* [2]. By fitting the simulation results, we assume that  
 632 the ratio between the SAF and UAF photon numbers can be approximated as follows for a numerical  
 633 aperture of 1.49 and an fluorescence wavelength  $\lambda_{fluo}$ :

$$\frac{N_{SAF}}{N_{UAF}} = 0.85 \exp\left(-\frac{z}{0.24 \lambda_{fluo}}\right) \quad (\text{S.12})$$

634 The signal of an emitter is divided in two parts so as to separate the UAF from the EPI fluorescence.  
 635 In this case, the mean of the Poisson distribution for each part can be expressed as:

$$\begin{aligned} \lambda_{EPI} = \lambda_0 &= \frac{(N_{UAF} + N_{SAF})}{2} \\ &= \frac{N_{UAF}}{2} (1 + 0.85 \exp(-\alpha z)) \end{aligned} \quad (\text{S.13a})$$

$$\lambda_{UAF} = \lambda_1 = \frac{N_{UAF}}{2} \quad (\text{S.13b})$$

636 with  $\alpha = \frac{1}{0.24 \lambda_{fluo}}$ . Thses terms can be used in **equation (S.4)** to obtain the two components of the  
 637 parameter vector with neglected Gaussian noise:

$$p_0^{(0)}(z) = \frac{1 + 0.85 \exp(-\alpha z)}{2 + 0.85 \exp(-\alpha z)} \quad (\text{S.14a})$$

638

$$p_1^{(0)}(z) = \frac{1}{2 + 0.85 \exp(-\alpha z)} \quad (\text{S.14b})$$

639 At this point, a background noise term  $B$  has to be introduced in the calculation.  $B$  is a photon  
 640 number associated to an optical signal produced mainly by fluorescent probes located outside the  
 641 focal plane and is approximated to 200 photons per channel in our calculations.  $B$  represents  $\lambda_{bj} = \lambda_b$ ,  
 642 considered constant for each channel. We define the  $SBR(z)$  as :

$$SBR(z) = \frac{\sum_{j=0}^1 \lambda_j}{\sum_{j=0}^1 \lambda_{bj}} = \frac{N_{UAF} (2 + 0.85 \exp(-\alpha z))}{4B} \quad (\text{S.15})$$

643 Finally, we can extract the expression of the Fisher information and the CRLB:

$$F = N \left( \frac{1}{\frac{SBR(z)}{SBR(z)+1} p_0^{(0)} + \frac{0.5}{SBR(z)+1}} \left( \frac{\partial SBR(z)}{\partial z} \frac{p_0^{(0)} - 0.5}{(SBR(z) + 1)^2} + \frac{\partial p_0^{(0)}}{\partial z} \frac{SBR(z)}{SBR(z) + 1} \right)^2 \right. \\ \left. + \frac{1}{\frac{SBR(z)}{SBR(z)+1} p_1^{(0)} + \frac{0.5}{SBR(z)+1}} \left( \frac{\partial SBR(z)}{\partial z} \frac{p_1^{(0)} - 0.5}{(SBR(z) + 1)^2} + \frac{\partial p_1^{(0)}}{\partial z} \frac{SBR(z)}{SBR(z) + 1} \right)^2 \right) \quad (\text{S.16a})$$

644

$$\Delta z_{CRLB}^{SAF} = \sqrt{\frac{1}{F(z)}} \quad (\text{S.16b})$$

645 with the different parameters:

$$\frac{\partial p_0^{(0)}}{\partial z} = -\frac{0.85 \alpha \exp(-\alpha z)}{(2 + 0.85 \exp(-\alpha z))^2} \quad (\text{S.17a})$$

$$\frac{\partial p_1^{(0)}}{\partial z} = \frac{0.85 \alpha \exp(-\alpha z)}{(2 + 0.85 \exp(-\alpha z))^2} \quad (\text{S.17b})$$

$$\frac{\partial SBR}{\partial z} = -\frac{N_{UAF} 0.85 \alpha \exp(-\alpha z)}{4B} \quad (\text{S.17c})$$

646

## 647 2 CRLB for astigmatism

648 The Cramér-Rao Lower Bound for the astigmatic detection is directly computed from the work of  
 649 Rieger and Stallinga [3]. We consider that an astigmatic PSF can be approximated by an elliptical  
 650 Gaussian PSF with different widths in  $x$  and  $y$ , noted  $w_x$  and  $w_y$ :

$$H = \frac{N}{2\pi w_x w_y} \exp - \left( \frac{(x - x_0)^2}{2w_x^2} + \frac{(y - y_0)^2}{2w_y^2} \right) \quad (\text{S.18})$$

651 From (S.18), the CRLB for the  $w_{x,y}$  parameters can be approximated with the semi-exact formula:

$$(\Delta w_{x,y})^2 \approx \frac{w_{x,y}^2}{2N} \left( 1 + 8\tau + \sqrt{\frac{9\tau}{1 + 4\tau}} \right) \quad (\text{S.19})$$

652 where  $\tau$  is approximately equal to the ratio between the peak and background intensities ( $a$  being  
653 pixel size):

$$\tau = \frac{2\pi b(w_x w_y + a^2/12)}{Na^2} \quad (\text{S.20})$$

654

655 The authors derive the axial detection position from the focus S curve:

$$f = \frac{w_x^2 - w_y^2}{w_x^2 + w_y^2} = \frac{2lz}{l^2 + d^2 + z^2} \quad (\text{S.21})$$

656 where  $d$  stands for the focal depth and  $2l$  is the distance between the focal lines. Usually, these two  
657 parameters are obtained by experimental measurements. The CRLB for the axial position is expressed  
658 as follows:

$$\left( \Delta z^{\text{astigmatic}} \right)^2 = \frac{(l^2 + d^2 + z^2)^4}{4l^2 (l^2 + d^2 - z^2)^2} (\Delta f)^2 \quad (\text{S.22a})$$

659

$$(\Delta f)^2 = (1 - f^2) \left( \left( \frac{\Delta w_x}{w_x} \right)^2 + \left( \frac{\Delta w_y}{w_y} \right)^2 \right) \quad (\text{S.22b})$$

660 By combining (S.19), (S.21), (S.22a) and (S.22b), the final expression of the CRLB for the axial position  
661 of astigmatic method reads:

$$\left( \Delta z^{\text{astigmatic}} \right)^2 = \frac{1}{N} \frac{(l^2 + d^2 + z^2)^4}{4l^2 (l^2 + d^2 - z^2)^2} \left( 1 - \left( \frac{2lz}{l^2 + d^2 + z^2} \right)^2 \right) \left( 1 + 8\tau + \sqrt{\frac{9\tau}{1 + 4\tau}} \right) \quad (\text{S.23})$$

662

### 663 3 CRLB for DAISY

664 In DAISY, the axial positions from SAF and astigmatism are merged according their uncertainties in  
665 order to optimize the final precision (see **Methods, Position merging** section, **equation (3)**):

$$z^{DAISY} = \left( \frac{z^{SAF}}{(\Delta z^{SAF})^2} + \frac{z^{astigmatic}}{(\Delta z^{astigmatic})^2} \right) / \left( \frac{1}{(\Delta z^{SAF})^2} + \frac{1}{(\Delta z^{astigmatic})^2} \right) \quad (S.24)$$

$$= \pi^{SAF} z^{SAF} + \pi^{astigmatic} z^{astigmatic}$$

666 where  $\pi^{SAF}$  and  $\pi^{astigmatic}$  are the relative weights of the SAF and astigmatic information sources  
 667 (note that these weights vary with the axial position):

$$\pi^{SAF} = \frac{1}{(\Delta z^{SAF})^2} / \left( \frac{1}{(\Delta z^{SAF})^2} + \frac{1}{(\Delta z^{astigmatic})^2} \right) \quad (S.25)$$

$$\pi^{astigmatic} = \frac{1}{(\Delta z^{astigmatic})^2} / \left( \frac{1}{(\Delta z^{SAF})^2} + \frac{1}{(\Delta z^{astigmatic})^2} \right)$$

668

669 The CRLB for DAISY then reads:

$$(\Delta z^{DAISY})^2 = (\pi^{SAF})^2 (\Delta z^{SAF})^2 + (\pi^{astigmatic})^2 (\Delta z^{astigmatic})^2 \quad (S.26)$$

670

#### 671 4 CRLB for the lateral detection

672 The lateral lower bound was obtained using the same assumptions (PSF shape, photon number,  
 673 background) than those described for the axial detection. We used the formula provided in [4]:

$$(\Delta x, y)^2 = \frac{w_{x,y}^2 + a^2/12}{N} \left( 1 + 4\tau + \sqrt{\frac{2\tau}{1+4\tau}} \right) \quad (S.27)$$

674

675 with  $\tau$  defined as in equation (S.20).

676 Like the axial position, the lateral position results from the merging of the measured lateral UAF and  
 677 EPI positions (see **Methods, Position merging** section, equations (1) and (2)). Thus it can be written  
 678 as a weighted sum:

$$x^{DAISY} = \pi_x^{UAF} x^{UAF} + \pi_x^{EPI} x^{EPI} \quad (S.28)$$

$$y^{DAISY} = \pi_y^{UAF} y^{UAF} + \pi_y^{EPI} y^{EPI}$$

679 where  $\pi_{x,y}^{UAF}$  and  $\pi_{x,y}^{EPI}$  are the relative weights of the UAF and EPI information sources for the  $x$  and  
 680  $y$  positions respectively (note that these weights vary with the axial position):

$$\pi_{x,y}^{UAF} = \frac{1}{(\Delta(x,y)^{UAF})^2} / \left( \frac{1}{(\Delta(x,y)^{UAF})^2} + \frac{1}{(\Delta(x,y)^{EPI})^2} \right) \quad (S.29)$$

$$\pi_{x,y}^{EPI} = \frac{1}{(\Delta(x,y)^{EPI})^2} / \left( \frac{1}{(\Delta(x,y)^{UAF})^2} + \frac{1}{(\Delta(x,y)^{EPI})^2} \right)$$

681 As a result, the CRLB finally reads:

$$\begin{aligned}(\Delta x^{DAISY})^2 &= (\pi^{UAF})^2 (\Delta x^{UAF})^2 + (\pi^{EPI})^2 (\Delta x^{EPI})^2 \\(\Delta y^{DAISY})^2 &= (\pi^{UAF})^2 (\Delta y^{UAF})^2 + (\pi^{EPI})^2 (\Delta y^{EPI})^2\end{aligned}\tag{S.30}$$

## 682 **Supplementary references**

- 683 [1] F. Balzarotti, Y. Eilers, K. C. Gwosch, A. H. Gynnå, V. Westphal, F. D. Stefani, J. Elf, and S. W.  
684 Hell, "Nanometer resolution imaging and tracking of fluorescent molecules with minimal photon  
685 fluxes," *Science*, vol. 355, pp. 606–612, dec 2016.
- 686 [2] W. T. Tang, E. Chung, Y.-H. Kim, P. T. C. So, and C. J. R. Sheppard, "Investigation of the point  
687 spread function of surface plasmon-coupled emission microscopy," *Optics Express*, vol. 15, no. 8,  
688 p. 4634, 2007.
- 689 [3] B. Rieger and S. Stallinga, "The lateral and axial localization uncertainty in super-resolution light  
690 microscopy," *ChemPhysChem*, vol. 15, no. 4, pp. 664–670, 2014.
- 691 [4] S. Stallinga and B. Rieger, "The effect of background on localization uncertainty in single emit-  
692 ter imaging," in *2012 9th IEEE International Symposium on Biomedical Imaging (ISBI)*, pp. 988–991,  
693 IEEE, may 2012.
